1 **Early life glucocorticoid exposure modulates immune function in zebrafish (*Danio rerio*) larvae**

2

3 Ruud van den Bos<sup>1\*</sup>, Suzanne Cromwijk<sup>1</sup>, Katharina Tschigg<sup>1</sup>, Joep Althuizen<sup>1</sup>, Jan Zethof<sup>1</sup>, Robert

4 Whelan<sup>2</sup>, Gert Flik<sup>1</sup>, Marcel Schaaf<sup>2</sup>

5

6 1: Department of Animal Ecology and Physiology, Institute of Water and Wetland Research, Faculty of

7 Science, Radboud University, Heyendaalseweg 135, 6525 AJ Nijmegen, the Netherlands

8 2: Animal Sciences and Health Cluster, Institute of Biology, Leiden University, 2333 CC Leiden, the

9 Netherlands

10

11 \*: author for correspondence: [ruudvdbos@science.ru.nl](mailto:ruudvdbos@science.ru.nl); [ruudvandenbos1@gmail.com](mailto:ruudvandenbos1@gmail.com)

12

13 **Keywords:** cortisol; glucocorticoid receptor; zebrafish; larvae; tail fin regeneration; lipopolysaccharide

14

15  
16  
17

**Abstract (number of words: 239)**

18 In this study we have assessed the effects of increased cortisol levels during early embryonic  
19 development on immune function in zebrafish (*Danio rerio*) larvae. Fertilized eggs were exposed to  
20 either a cortisol-containing, a dexamethasone-containing (to stimulate the glucocorticoid receptor  
21 selectively) or a control medium for 6 hours post-fertilisation (0-6 hpf). First, we measured baseline  
22 expression of a number of immune-related genes (*socs3a*, *mpeg1.1*, *mpeg1.2* and *irg1l*) 5 days post-  
23 fertilisation (dpf) in larvae of the AB and TL strain to assess the effectiveness of our exposure  
24 procedure and potential strain differences. Cortisol and dexamethasone strongly up-regulated  
25 baseline expression of these genes independent of strain. The next series of experiments were  
26 therefore carried out in larvae of the AB strain only. We measured neutrophil/macrophage recruitment  
27 following tail fin amputation (performed at 3 dpf) and phenotypical changes as well as survival  
28 following LPS-induced sepsis (150 µg/ml; 4-5 dpf). Dexamethasone, but not cortisol, exposure at 0-6  
29 hpf enhanced neutrophil recruitment 4 hours post tail fin amputation. Cortisol and dexamethasone  
30 exposure at 0-6 hpf led to a milder phenotype (e.g. less tail fin damage) and enhanced survival  
31 following LPS challenge compared to control exposure. Gene-expression analysis showed  
32 accompanying differences in transcript abundance of *tlr4bb*, *cxcr4a*, *myd88*, *il1β* and *il10*. These data  
33 show that early-life exposure to cortisol, which may be considered to be a model or proxy of maternal  
34 stress, induces an adaptive response to immune challenges, which seems mediated via the  
35 glucocorticoid receptor.

36 **Abbreviations used in the manuscript**

37 **ANOVA**: analysis of variance; **GR**: glucocorticoid receptor; **dpf**: days post-fertilisation; **GFP**: green  
38 fluorescent protein; **hpa**: hours post-amputation; **hpf**: hours post-fertilisation; **HPI-axis**: hypothalamus  
39 – pituitary - interrenal axis; **IL**: interleukine; **KMO**: Kaiser-Meyer-Olkin; **LPS**: lipopolysaccharide;  
40 **MANOVA**: multivariate analysis of variance; **MR**: mineralocorticoid receptor; **ns**: not significant; **PBS**:  
41 phosphate buffered saline; **qPCR**: quantitative polymerase chain reaction; **SEM**; standard error of the  
42 mean; **TLR**: Toll-like receptor; **Tukey HSD**: Tukey Honestly Significant Difference

## 43 1. Introduction

44 In teleosts, like zebrafish (*Danio rerio*), cortisol is the main endogenous corticosteroid, which is  
45 secreted when individuals perceive situations as stressful (Wendelaar Bonga, 1997). Like in other  
46 vertebrate species, cortisol binds in teleosts to the mineralocorticoid receptor (MR) and the  
47 glucocorticoid receptor (GR), which affect the transcription rates of genes following ligand binding  
48 (Alderman and Bernier, 2009; Alsop and Vijayan, 2008; Nesan and Vijayan, 2013). Since the GR has  
49 a lower affinity for cortisol than the MR, the GR mediates the actions of cortisol during stress, which  
50 involves optimizing energy expenditure by tuning the balance between and within physiological  
51 systems, like an organism's metabolism and its immune, cardiovascular and central nervous system  
52 (e.g. Gorissen and Flik, 2016; Nesan and Vijayan, 2013; Wendelaar Bonga, 1997). Following long-  
53 term exposure to stress, baseline levels of cortisol are increased, reflecting the allostatic load that the  
54 environment imposes on an organism (Gorissen and Flik, 2016; McEwen and Wingfield, 2003).  
55 Cortisol has been shown to signal through the GR already during the very early stages of embryonic  
56 development; in oocytes maternally deposited cortisol and GR mRNA are present (Pikulkaew *et al.*,  
57 2010, 2011; Wilson *et al.*, 2013). These cortisol levels may reflect the allostatic load that the mothers  
58 experience in their environment and it has therefore been hypothesized that these deposited cortisol  
59 levels are important for preparing the offspring for the expected allostatic load that larvae will  
60 encounter in the prevailing environment, thereby programming their cortisol secretion and the  
61 functioning of physiological systems to meet expected demands (Nesan and Vijayan, 2013; van den  
62 Bos *et al.*, 2019). While in previous studies we focussed on the effects of cortisol exposure (between 0  
63 and 6 hours post fertilisation (hpf)) on vigilance-related behaviour, baseline cortisol levels and  
64 metabolism in larvae (van den Bos *et al.*, 2019; van den Bos, 2019) in the present study we focussed  
65 on the functioning of the immune system, in particular the innate immune system on which zebrafish  
66 larvae rely (Meijer and Spaik, 2011). Cortisol exposure may be considered to be a model or proxy of  
67 maternal stress (Best *et al.*, 2017; Nesan and Vijayan, 2012, 2016; van den Bos *et al.*, 2019).

68 Zebrafish is a highly suitable animal model to study early life events in the fields of biomedical  
69 research, behavioural biology and eco-toxicology (e.g. Champagne *et al.*, 2010; Dai *et al.*, 2013;  
70 Nesan and Vijayan, 2013; Steenbergen *et al.*, 2011; Stewart *et al.*, 2014). Fertilized eggs develop into  
71 independently feeding larvae outside the mother, without parental care, and can easily be maintained  
72 under different experimental conditions as well as pharmacologically manipulated. In zebrafish, it has

73 been demonstrated that mothers deposit cortisol and GR mRNA in oocytes (Pikulkaew *et al.*, 2010,  
74 2011; Wilson *et al.*, 2013). These cortisol levels decrease over the first 24 hours post fertilisation, after  
75 which zygotes start to produce cortisol by the then developing interrenal cells (Liu, 2007; Pikulkaew *et al.*  
76 *et al.*, 2010, 2011; Wilson *et al.*, 2013). After hatching (48-72 hpf) pituitary control over interrenal cortisol  
77 production starts and it takes another 4-5 days before the hypothalamus-pituitary-interrenal (HPI) axis  
78 is fully functionally mature (Alderman and Bernier, 2009; Alsop and Vijayan, 2008). Maternal GR  
79 mRNA is present during the first 6 hpf, and at 8-9 hpf zygotic expression of the GR commences, while  
80 the MR mRNA production starts at 24 hpf (Alsop and Vijayan, 2008; Pikulkaew *et al.*, 2010, 2011).

81 In several studies the effect of cortisol exposure during early embryonic stages has been  
82 investigated in zebrafish. In these studies cortisol levels were increased by injection of cortisol into the  
83 yolk of one-cell stage embryos (e.g. Best *et al.*, 2017; Nesan and Vijayan, 2012, 2016) or through  
84 addition of cortisol to the medium (Hartig *et al.*, 2016; van den Bos *et al.*, 2019). These studies  
85 showed that, as a result of the cortisol exposure during early embryonic stages, larval baseline levels  
86 of cortisol were increased (Best *et al.*, 2017; Hartig *et al.*, 2016; Nesan and Vijayan, 2012; van den  
87 Bos *et al.*, 2019). For example, in a recent study, we have demonstrated that cortisol exposure  
88 between 0 and 6 hpf increased baseline cortisol levels 5 days post fertilisation (dpf) and this effect was  
89 stronger in larvae from the AB strain than in larvae from the TL strain (van den Bos *et al.*, 2019).

90 Exposure to cortisol (0-5 dpf) has been shown to lead to an enhanced expression of immune-  
91 related genes in zebrafish larvae at 5 dpf (Hartig *et al.*, 2016), suggesting that early cortisol exposure  
92 increases the activity of the immune system. In the present study, we have first measured the  
93 expression of a selected number of these up-regulated genes at 5 dpf (*socs3a*, *mpeg1.1*, *mpeg1.2*,  
94 *irg1l*) following 0-6 hpf exposure to cortisol in zebrafish larvae of the AB strain to assess whether our  
95 method produces similar effects. Tüpfel long-fin (TL) is another widely used zebrafish strain next to AB  
96 and is characterized by spots rather than stripes as well as long fins rather than short fins. In previous  
97 studies we have observed consistent differences between larvae of the AB strain and larvae of the TL  
98 strain at the level of both HPI-axis activity and behaviour (van den Bos *et al.*, 2017a, 2017b, 2019a,  
99 2020). We have attributed these differences to the mutation in the connexin 41.8 gene that leads to  
100 spots (for discussion: see van den Bos *et al.*, 2020). Measuring the expression of these genes in  
101 larvae of the TL strain next to larvae in the AB strain may therefore reveal how robust our findings are.

102 Finally, to assess the role of the GR in more detail, we exposed fertilized eggs 0-6 hpf to  
103 dexamethasone, a specific GR agonist (Rupprecht *et al.*, 1993).

104 To functionally assess the activity of the immune system following early life exposure to  
105 cortisol or dexamethasone, we used two experimental models for immune activation. First, we used  
106 the tail fin amputation assay. This is a well-established model in which amputation of the tail triggers  
107 expression of many pro-inflammatory molecules and the recruitment of innate immune cells  
108 (neutrophils and macrophages) towards the wounded area (Hall *et al.*, 2014; Renshaw *et al.*, 2006;  
109 Roehl, 2018). The tail fin amputation assay was performed using the double transgenic fish line  
110 *Tg(mpx:GFP/mpeg1:mCherry-F)* (Bernut *et al.*, 2014; Renshaw *et al.*, 2006). Recruitment of  
111 neutrophils and macrophages was determined following tail fin amputation in larvae at 3 dpf  
112 (Chatzopoulou *et al.*, 2016; Xie *et al.*, 2019). Second, we used a sepsis model, which involved a  
113 challenge with lipopolysaccharide (LPS), the membrane component of Gram-negative bacteria, in 4  
114 dpf larvae. We measured survival, phenotypical changes, and the expression of a series of LPS-  
115 responsive genes (Dios *et al.*, 2014; Hsu *et al.*, 2018; Novoa *et al.*, 2009; Philip *et al.*, 2017).

116

## 117 **2. Materials and Methods**

### 118 **2.1. Subjects, spawning and care**

119 Housing conditions and breeding procedures were similar as those reported in van den Bos *et al.*  
120 (2017a, 2017b, 2019; AB and Tüpfel long-fin (TL) strains) or Xie *et al.* (2019; the double transgenic  
121 fish line *Tg(mpx:GFP/mpeg1:mCherry-F)*. They were kept in recirculation systems (~28°C) under a  
122 14h:10h light-dark cycle and fed twice daily.

123 Breeding started at least one hour after the last feeding of zebrafish (>16:00 h). Males and  
124 females of the AB or TL strain were placed in a zebrafish breeding tank, separated by a partitioning  
125 wall, with water of ~28°C. After turning on the lights the next morning, the partitioning wall was  
126 removed and tanks were placed at a slight angle, such that the fish had the possibility to move into  
127 shallow water to spawn.

128

### 129 **2.2. Cortisol/dexamethasone exposure during early embryonic development (0-6 hpf)**

130 Cortisol (hydrocortisone; Sigma-Aldrich, Zwijndrecht, the Netherlands) and dexamethasone (Sigma-  
131 Aldrich, Zwijndrecht, the Netherlands) were dissolved in 96% ethanol in the required stock solution

132 concentrations and stored at  $-20^{\circ}\text{C}$ . From these stock solutions media with the appropriate  
133 concentration were freshly prepared for each experiment (Althuisen, 2018; van den Bos *et al.*, 2019):  
134 cortisol-containing medium: 400  $\mu\text{g/l}$  cortisol ( $1.1\ \mu\text{M}$ ), 0.4 ml/l 96% ethanol (0.04% v/v), 5 mM NaCl,  
135 0.17 mM KCl, 0.33 mM  $\text{CaCl}_2$ , 0.33 mM  $\text{MgSO}_4$  in dH<sub>2</sub>O; dexamethasone-containing medium: 430  
136  $\mu\text{g/l}$  dexamethasone ( $1.1\ \mu\text{M}$ ), 0.4 ml/l 96% ethanol (or 1 ml/l 96% ethanol (0.1% v/v)); depending on  
137 the specific experiment), 5 mM NaCl, 0.17 mM KCl, 0.33 mM  $\text{CaCl}_2$ , 0.33 mM  $\text{MgSO}_4$  in dH<sub>2</sub>O.  
138 Control medium consisted of: 0.4 ml/l 96% ethanol (or 1 ml/l 96% ethanol; depending on the specific  
139 experiment), 5 mM NaCl, 0.17 mM KCl, 0.33 mM  $\text{CaCl}_2$ , 0.33 mM  $\text{MgSO}_4$  in dH<sub>2</sub>O.

140 Directly following spawning and fertilization, eggs were collected and randomly assigned to  
141 Petri dishes filled with either cortisol-containing, dexamethasone-containing or control medium. Within  
142 1-1.5 hpf Petri dishes were placed in an incubator set at  $28.5^{\circ}\text{C}$  (300–350 lux). Eggs were exposed to  
143 these solutions for 6 hrs. It has been shown that both cortisol and dexamethasone diffuse inside the  
144 eggs in this period (Steenbergen *et al.*, 2017). In addition, we have shown this procedure to be  
145 effective in eliciting changes in physiology and behaviour at 5 dpf (Althuisen, 2018; van den Bos *et al.*,  
146 2019).

147 Following this, cortisol-containing, dexamethasone-containing and control media were  
148 replaced by E3 medium (5 mM NaCl, 0.17 mM KCl, 0.33 mM  $\text{CaCl}_2$ , 0.33 mM  $\text{MgSO}_4$ , 3 ml/l 0.01%  
149 (w/v) methylene blue in dH<sub>2</sub>O). Embryos were rinsed twice in E3 medium to ensure that the original  
150 treatment media were completely removed. Petri dishes were returned to the incubator allowing the  
151 embryos to develop further ( $28.5^{\circ}\text{C}$ ; 14h:10h light-dark period (lights on: 09.00h – 23.00h); light phase:  
152 300–350 lux; dark phase; 0 lux). At 1 and 4 dpf E3 medium was refreshed and unfertilized eggs, dead  
153 eggs/embryos/larvae and chorions were removed from the dishes.

154 All experiments were carried out in accordance with the Dutch Experiments on Animals Act  
155 (<http://wetten.overheid.nl/BWBR0003081/2014-12-18>), the European guidelines for animal  
156 experiments (Directive 2010/63/EU; [http://eur-lex.europa.eu/legal-content/NL/TXT/HTML/?uri=](http://eur-lex.europa.eu/legal-content/NL/TXT/HTML/?uri=CELEX:32010L0063)  
157 CELEX:32010L0063) and institutional regulations (Radboud University or Leiden University). Larvae  
158 were euthanized by placing them in ice slurry for at least 20 minutes followed by adding bleach to the  
159 slurry. In case of anaesthesia 0.01% 2-phenoxyethanol (Sigma Aldrich, Zwijndrecht, the Netherlands;  
160 experiments Radboud University) or 0.02% buffered aminobenzoic acid ethyl ester (tricaine; Sigma  
161 Aldrich, Zwijndrecht, the Netherlands; experiments Leiden University) was used.

162

### 163 **2.3 Baseline gene expression analysis.**

164 Following 0-6 hpf exposure to the different media, larvae of the AB and TL strain were sampled for  
165 gene expression at 5 dpf between 16:00 hrs and 19:00 hrs (van den Bos *et al.*, 2019; experimental  
166 time-line: figure 1). Genes of interest were: *socs3a*, *mpeg1.1*, *mpeg1.2* and *irg1l* (for primer  
167 sequences of these genes: see van den Bos *et al.*, 2017a). Gene expression was determined by  
168 qPCR analysis as described below.

169

### 170 **2.4 Tail fin amputation assay**

171 The tail fin amputation assay was performed using the double transgenic fish line  
172 *Tg(mpx:GFP/mpeg1:mCherry-F*; Bernut *et al.*, 2014; Renshaw *et al.*, 2006). Three-day-old zebrafish  
173 larvae were anaesthetized in E3 medium containing 0.02% buffered tricaine and loaded onto 2%  
174 agarose-coated Petri dishes (experimental time-line: figure 1). Amputation was performed with a 1 mm  
175 sapphire blade (World Precision Instruments, Friedberg, Germany) using a Leica M165C  
176 stereomicroscope and a micromanipulator (Leica Microsystems BV, Amsterdam, the Netherlands; see  
177 below, figure 3A). Larvae were fixed in 4% paraformaldehyde in PBS at 4 hours post amputation (hpa)  
178 and stored overnight at 4°C. The following day larvae were washed twice for one minute and then  
179 twice for five minutes in PBS containing 0.01% Tween 20 (Sigma Aldrich, Zwijndrecht, the  
180 Netherlands).

181 A Leica M205FA fluorescence stereomicroscope supported by LAS software (version 4.12.0;  
182 Leica Microsystems BV, Amsterdam, the Netherlands) was utilised to visualise the leukocytes.  
183 Detection of neutrophils and macrophages was based on their fluorescent GFP and mCherry signals  
184 respectively. To quantify cell migration towards the wounded area, cells within a distance of 200µm  
185 from the amputation site were counted manually, as previously described (Xie *et al.*, 2019). Data  
186 (numbers of migrated neutrophils and macrophages per individual) were pooled from three individual  
187 experiments (n>10 per experiment), and the presented data are means (± SEM).

188

### 189 **2.5. LPS exposure**

190 First, we conducted a pilot study to assess the optimal LPS dose, exposure duration and parameters  
191 to be measured (protocols adapted from: Dios *et al.*, 2014; Hsu *et al.*, 2018; Novoa *et al.*, 2009; Philip



192 *et al.*, 2017). Incubation for 30 minutes in 150 µg/ml LPS (B11.04; Sigma Aldrich, Zwijndrecht, the  
193 Netherlands) was effective in eliciting a robust increase in *il1β* expression (assessed using qPCR  
194 analysis), changes in tail fin morphology (swollen or damaged tails) and increased levels of reactive  
195 oxygen species (ROS; measured by a fluorescent labelling method according to Philip *et al.*, 2017).  
196 Hence, we used this dose in subsequent experiments.

197 Subsequently, two experiments were conducted. In both experiments 4 dpf larvae were  
198 exposed to 150 µg/ml LPS (B11.04; Sigma Aldrich, Zwijndrecht, the Netherlands) in E2 medium or  
199 control E2 medium for 30 minutes in Petri dishes (n=50 in 25 ml; experimental time-line: figure 1).  
200 Following this exposure, LPS-containing medium or control E2 medium was replaced by fresh E2  
201 medium (larvae were rinsed two times to ensure that the original media were removed). Larvae either  
202 remained in the Petri dishes for sampling for gene expression at later time points or were transferred  
203 individually to 24 wells plates (Greiner Bio-One BV, Alphen a/d Rijn, the Netherlands) for assessing  
204 phenotypical changes and survival (volume per well: 1-1.5 ml). Six treatment groups were thus  
205 created: 0-6 hpf control, cortisol or dexamethasone treatment, combined with either 4 dpf LPS or  
206 control treatment (for 30 min).

207 In the first experiment the level of gene expression at 0 hr, 0.5 hr (i.e. directly following  
208 exposure), 1 hr (i.e. 30 minutes after ending exposure) and 3 hrs (i.e. 2.5 hrs after ending exposure;  
209 Novoa *et al.*, 2009) was determined by qPCR analysis as described below. Genes of interest (see  
210 papers by: Hsu *et al.*, 2018; Kanwal *et al.*, 2013; Novoa *et al.*, 2009; Philip *et al.*, 2017) were genes  
211 encoding proteins involved in barrier function of the vascular endothelium (*cldn5a*, *cldn2*, *oclnb*), Toll-  
212 like receptors (*tlr2*, *tlr4ba*, *tlr4bb*, *tlr5a*, *tlr5b*), and regulators of the immune response (*il1β*, *il10*,  
213 *myd88*, *cxcr4a*, *cxcr4b*, *ptpn6*). Primer sequences are listed in Table 1.

214 In addition, in the first experiment survival and phenotypical changes were determined at 0, 4  
215 (i.e. 3.5 hrs after ending exposure) and 28 hrs (i.e. 27.5 hrs after ending exposure). Phenotypical  
216 changes included (see Philip *et al.*, 2017): changes in tail fin morphology (normal, swollen (oedema)  
217 or damaged), presence of heart oedema and changes in shape (straight or curved). In the second  
218 experiment (that also served as replicate for the first experiment) survival and phenotypical changes  
219 were measured at 0, 0.5, 1, 3, 6 and 24 hrs (i.e. before exposure, directly after exposure, 0.5 hrs after  
220 ending exposure, 2.5 hrs after ending exposure, 5.5 hrs after ending exposure and 23.5 hrs after  
221 ending exposure).

222

## 223 **2.6 Gene expression analysis**

224 For the assessment of gene expression levels by qPCR analysis, 3-5 larvae were transferred to a 2-ml  
225 Eppendorf tube; thus, one sample contained material from 3-5 larvae. Residual medium was removed  
226 with a pipette, tubes were snap frozen in liquid nitrogen, kept on ice during the sampling procedure,  
227 and subsequently stored at -80 °C until total RNA extraction.

228 RNA isolation, RNA preparation, removal of genomic DNA from the samples and synthesis of  
229 cDNA was performed according to the protocol described in van den Bos *et al.* (2017a). Total RNA  
230 content of each sample was isolated. This was done by homogenising the tissue with 400 µl Trizol  
231 reagent (Invitrogen, Carlsbad, USA) in a Grinding Mill (Retsch GmbH, Germany) for 20 s at 20 Hz.  
232 After homogenisation, samples were kept at room temperature for 5 min. Next, 80 µl chloroform was  
233 added and the solution was mixed by shaking for 15 s. Afterwards, samples were kept at room  
234 temperature for 2 min. The samples were centrifuged at 14,000 rpm for 10 min in a cooled centrifuge  
235 (4°C) and the aqueous phase of the samples was transferred to a new tube. To this phase, 200 µl  
236 isopropanol was added and this solution was mixed well by inversion of the tube. The solution was  
237 then stored at -20°C for 2 h and centrifuged afterwards for 15 min at 14,000 rpm in a cooled centrifuge  
238 (4°C). The supernatant was decanted and the pellet washed with 500 µl 75% ethanol and centrifuged  
239 10 min at 14,000 rpm in a cooled centrifuge (4°C). The supernatant was decanted, after which the  
240 pellet was centrifuged for 5 s to remove all the remaining supernatant using a pipette. The pellet  
241 containing the RNA was air-dried for 10 min at room temperature and afterwards dissolved in 100 µl  
242 ice cold DEPC-treated dH<sub>2</sub>O. To this RNA solution, 10 µl 3M NaAc (pH 5.4) and 250 µl 100% ethanol  
243 were added. The solution was mixed by inverting the tube and samples were stored for 2 h at -20°C.  
244 Subsequently, the samples were centrifuged for 15 min at 14,000 rpm in a cooled centrifuge (4°C),  
245 and the supernatant was decanted and the pellet washed as described earlier. Finally, the  
246 RNA pellet was dissolved in 15 µl DEPC-treated dH<sub>2</sub>O. The concentration and quality of RNA in each  
247 sample were measured using a nanodrop spectrophotometer at 260 nm wavelength (Nanodrop,  
248 Wilmington, DE, USA).

249 Isolated RNA was treated with DNase to remove any (genomic) DNA from the sample; 400 ng  
250 RNA was transferred into a PCR strip, and DEPC-treated dH<sub>2</sub>O was added to a volume of  
251 8 µl. To this, 2 µl of DNase mix was added, containing 1 µl 10x DNase I reaction buffer and

252 1  $\mu$ l (1 U/ $\mu$ l) amplification grade DNase I (both from Invitrogen, Carlsbad, USA). The resulting mix was  
253 incubated for 15 min at room temperature. Afterwards, 1  $\mu$ l 25 mM EDTA was added to stop the  
254 DNase reaction and the reaction mix was incubated for 10 min at 65°C and returned on ice.

255 After the DNase treatment, samples were used to synthesize cDNA by the addition of 1  $\mu$ l  
256 random primers (250 ng/ $\mu$ l), 1  $\mu$ l 10 mM dNTP mix, 4  $\mu$ l 5 x 1st strand buffer, 1  $\mu$ l 0.1M DTT,  
257 1  $\mu$ l RNase inhibitor (10 U/ $\mu$ l), 0.5  $\mu$ l Superscript II (reverse transcriptase) (200 U/ $\mu$ l) (all from  
258 Invitrogen, Carlsbad, USA) and 0.5  $\mu$ l DEPC-treated dH<sub>2</sub>O. The resulting mix was incubated for 10  
259 min at 25°C for annealing of the primers and then 50 min at 42°C for reverse transcription. Enzymes  
260 were hereafter inactivated by incubating samples at 70°C for 15 min. Finally, 80  $\mu$ l dH<sub>2</sub>O was added  
261 to dilute the samples five times for the qPCR reaction.

262 To measure the relative gene expression in each sample, real-time qPCR was carried out for  
263 each gene of interest. For each qPCR reaction, 16  $\mu$ l PCR mix (containing 10  $\mu$ l SYBR green mix (2x)  
264 (BioRad, Hercules, USA), 0.6  $\mu$ l forward and reverse gene-specific primer (10  $\mu$ M) and 4.8  $\mu$ l H<sub>2</sub>O)  
265 was added to 4  $\mu$ l of cDNA. The qPCR reaction (3 min 95°C, 40 cycles of 15 s 95°C and 1 min 60°C)  
266 was carried out using a CFX 96 (BioRad, Hercules, USA) qPCR machine. Analysis of the data was  
267 carried out using a normalisation index of two reference genes (viz. *elongation factor alpha (elf1a)* and  
268 *ribosomal protein L13 (rpl13)*) (Vandesompele *et al.*, 2002).

269

## 270 **2.7. Statistics**

271 For gene expression analyses, outliers were removed following Grubb's outlier test ( $p \leq 0.01$ ). We  
272 explored the interrelationships of transcript abundance levels using Principal Component Analysis  
273 (PCA) with orthogonal rotation (Varimax rotation with Kaiser normalization; see van den Bos *et al.*,  
274 2017b). In case of missing samples, data were excluded list-wise. The number of retained  
275 components was based on eigenvalues ( $>1$ ) and visual inspection of the scree plot. The Kaiser-  
276 Meyer-Olkin (KMO) measure of sampling adequacy and Bartlett's test of sphericity were done to  
277 ensure that data obeyed analysis criteria; both are measures to assess whether the correlation matrix  
278 is suited for factor analysis (Budaev, 2010). Component scores were saved and used for further  
279 statistical analysis. The following component loading cut-off points were considered:  $\leq -0.600$  or  
280  $\geq 0.600$  (Ferguson, 1989; Budaev, 2010).

281 For the basal gene expression values a two-way or three-way Analysis of Variance (ANOVA)  
282 was run with treatment, strain or batch (where applicable) as independent factors. In the tail fin  
283 amputation assay a Student's t-test was run on the number of neutrophils or macrophages at 4 hpa  
284 comparing 0-6 hpf treatment groups (cortisol *versus* control; dexamethasone *versus* control).  
285 In the LPS exposure experiment, for gene expression a multivariate analysis of variance (MANOVA)  
286 was run (to account for multiple comparisons) followed by univariate analysis of variance (0-6 hpf  
287 treatment and time as independent factors followed by post-hoc testing (Tukey HSD)). In addition per  
288 time point a one-way ANOVA was run with 0-6 hpf treatment as factor followed by post-hoc testing  
289 (Tukey HSD).

290 In the LPS exposure experiment differences in survival rate were assessed using the Kaplan-  
291 Meijer procedure (Log Rank Mantel-Cox). Differences in phenotypical changes were compared using  
292 Chi-square tests.

293 Significance was set at  $p \leq 0.05$  and trends are indicated ( $p \leq 0.10$ ) where appropriate; ns: not  
294 significant:  $p > 0.10$ . Unless otherwise stated all p-values are two-tailed. All statistical analyses were  
295 done using IBM SPSS version 23 (IBM, Armonk, NY, USA).

296

## 297 **3 Results**

### 298 **3.1 Baseline gene expression analysis**

299 Rather than analysing transcript abundance of different genes following glucocorticoid treatment  
300 (cortisol or dexamethasone, 0-6 hpf) separately, we explored the effects of exposure through the  
301 interrelationships of transcript abundance of genes using PCA.

302 A PCA for the 0-6 hpf cortisol treatment experiment revealed two components (figure 2A;  
303 supplementary figure 1A shows the transcript abundance of individual genes). The KMO value was  
304 sufficiently high (0.522) and Bartlett's test of sphericity was highly significant (Chi-square=17.707,  
305  $df=6$ ,  $p \leq 0.007$ ), indicating that the data were adequate for a PCA. The first component (explaining  
306 44.0% of the variance) was comprised of *irg1l* (loading: 0.854) and *socs3a* (loading: 0.890); the  
307 second component (explaining 28.9% of the variance) of *mpeg1.1* (loading: 0.890) and *mpeg1.2*  
308 (loading: 0.890). Each component was analysed separately using ANOVA. Treatment (0-6 hpf) with  
309 cortisol enhanced transcript abundance of genes in component 1 (*irg1l* and *socs3a*) independent of  
310 strain (three-way ANOVA (strain, treatment, batch): treatment:  $F(1,23)=6.477$ ,  $p \leq 0.018$ ). Transcript

311 abundance was overall higher in TL than AB larvae (strain:  $F(1,23)=7.023$ ,  $p\leq 0.014$ ). Treatment (0-6  
312 hpf) with cortisol enhanced transcript abundance of genes in component 2 (*mpeg1.1* and *mpeg1.2*)  
313 independent of strain (three-way ANOVA (strain, treatment, batch): treatment:  $F(1,23)=7.660$ ,  
314  $p\leq 0.011$ ).

315 A PCA for the 0-6 hpf dexamethasone treatment experiment revealed only one component  
316 (figure 2B; supplementary figure 1B shows the transcript abundance of individual genes). The KMO  
317 was sufficiently high (0.626) and Bartlett's test of sphericity was highly significant (Chi-  
318 square=102.945,  $df=6$ ,  $p<0.001$ ), indicating that the data were adequate for a PCA. This component  
319 explained 76.6% of the variance. Loadings onto this component were: *irg1l* (0.867), *socs3a* (0.835),  
320 *mpeg1.1* (0.928) and *mpeg1.2* (0.868). Treatment with dexamethasone enhanced transcript  
321 abundance of genes independent of strain (two-way ANOVA (strain, treatment): treatment:  
322  $F(1,33)=6.745$ ,  $p\leq 0.014$ ).

323 These data show that glucocorticoid treatment was effective in eliciting changes in baseline  
324 expression of (a selected set of) immune-related genes.

325

### 326 **3.2 Tail fin amputation assay**

327 Figure 3A shows the site of the tail fin amputation performed at 3 dpf. Neutrophil recruitment at 4 hpa  
328 was enhanced in the 0-6 hpf dexamethasone treatment group (Student's t-test:  $t=2.917$ ,  $df=106$ ,  
329  $p\leq 0.004$ ; figure 3C), but not in the 0-6 hpf cortisol treatment group (Student's t-test:  $t=0.621$ ,  $df=89$ , ns;  
330 figure 3B), compared to the group treated with control medium at 0-6 hpf. No effects were found for  
331 macrophage recruitment for either 0-6 hpf cortisol treatment (Student's t-test:  $t=0.923$ ,  $df=89$ , ns;  
332 figure 3B) or 0-6 hpf dexamethasone treatment (Student's t-test:  $t=-1.095$ ,  $df=106$ , ns; figure 3C).

333

### 334 **3.3 LPS exposure**

#### 335 *Survival*

336 In the LPS exposure experiments, we never observed any morphological changes or mortality in the 4  
337 dpf control groups. Hence, we only present the data of the 4 dpf LPS-treated groups. Figure 3 shows  
338 the survival data of both LPS exposure experiments. Only 27.8% of the 0-6 hpf control-treated larvae  
339 survived in the first LPS exposure experiment (figure 4A), while 79.2% survived in the second LPS  
340 exposure experiment (figure 4B). In both LPS exposure experiments the number of larvae that

341 survived following glucocorticoid treatment 0-6 hpf appeared to be higher (Log Rank Mantel Cox; first  
342 LPS exposure experiment: overall Chi-square=20.863, df=2,  $p<0.001$ ; second LPS exposure  
343 experiment: overall Chi-square=5.824, df=2,  $p\leq 0.054$ ). Pair-wise comparison revealed that (1) in both  
344 LPS exposure experiments survival was significantly higher in 0-6 hpf cortisol-treated than 0-6 hpf  
345 control-treated larvae ((Log Rank Mantel Cox; Chi-square=14.385, df=1,  $p<0.001$ ; Chi-square=5.466,  
346 df=1,  $p\leq 0.019$ ), while (2) survival was significantly higher in the first LPS exposure experiment (Log  
347 Rank Mantel Cox; Chi-square=12.436, df=1,  $p<0.001$ ), but not the second LPS exposure experiment  
348 (Log Rank Mantel Cox; Chi-square=1.370, df=1, ns) in 0-6 hpf dexamethasone-treated larvae  
349 compared to 0-6 hpf control-treated larvae.

350

### 351 *Phenotypical effects and gene expression endothelium-related genes*

352 In the first LPS exposure experiment phenotypical changes were measured at 4 and 28 hrs, i.e. 3.5  
353 hrs and 27.5 hrs after ending exposure. Table 2 shows the numbers of dead larvae and of larvae that  
354 were alive and displayed phenotypical changes. We observed LPS-induced changes in the shape of  
355 the larvae (curved larvae), tail fin morphology (swollen or damaged tail fins) and heart cavity  
356 (oedema). Larvae were scored as either affected (at least one of these changes present) or not (no  
357 changes in any of the parameters). Supplementary table 1 shows the scores of the individual  
358 parameters at 4 hrs (the number of larvae of the control treated group alive at 28 hrs was too low for a  
359 meaningful statistical analysis between treatments).

360 While the scores at 4 hrs suggested that the LPS-induced effects were less strong in  
361 glucocorticoid-treated larvae than in control-treated larvae, this was not (as yet) significant (Chi-  
362 square=5.81, df=2, ns). LPS-induced effects were less strong in glucocorticoid-treated larvae than in  
363 control-treated larvae at 28 hrs (overall Chi-square=25.33, df=2,  $p<0.001$ ). Pair-wise comparison  
364 showed that both cortisol-treated (Chi-square=18.05, df=2,  $p<0.001$ ) and dexamethasone-treated  
365 (Chi-square=18.34, df=2,  $p<0.001$ ) groups showed fewer dead and fewer malformed larvae than  
366 control-treated subjects following LPS exposure.

367 In addition to the phenotypical changes that we studied, we measured expression levels of  
368 genes related to endothelial barrier function (*clnd5a*, *clnd2* and *oclnb*). Transcript abundance of *clnd5a*  
369 was higher in cortisol-treated (Tukey HSD:  $p<0.001$ ) and dexamethasone-treated larvae (Tukey HSD:  
370  $p\leq 0.067$ ) compared to control-treated larvae (two-way ANOVA; treatment and time as independent

371 factor; treatment:  $F(2,36)=9.815$ ,  $p<0.001$ ; figure 5A). Transcript abundance of *clnd2* was lower in  
372 cortisol-treated (Tukey HSD:  $p\leq 0.034$ ) and dexamethasone-treated larvae (Tukey HSD:  $p\leq 0.093$ )  
373 compared to control-treated larvae (two-way ANOVA; treatment and time as independent factor;  
374 treatment:  $F(2,36)=9.815$ ,  $p<0.001$ ; figure 5B). At 3 hrs transcript abundance of *clnd2* was higher than  
375 at other time points in all treatment groups (Tukey HSD;  $p<0.001$ ; time:  $F(2,36)=13.425$ ,  $p<0.001$ ).  
376 Transcript abundance of *oclnb* was lower in cortisol-treated and dexamethasone-treated larvae than in  
377 control-treated larvae at baseline (0 hr), but higher at 3 hrs following LPS exposure (two-way ANOVA;  
378 treatment and time as independent factor; treatment \*time:  $F(3,36)=6.404$ ,  $p<0.001$ ; figure 5C).

379 In the second LPS exposure experiment we measured changes in tail fin morphology and  
380 shape as we hardly observed any oedema in the heart cavity in the first LPS exposure experiment.  
381 Figure 6 shows the changes in tail fin morphology following LPS exposure. In control-treated larvae  
382 there was a clear and rapid loss of normal tail fin structure and a shift towards swollen or damaged tail  
383 fins, while this was not the case in the glucocorticoid-treated larvae. Statistical analysis showed that at  
384 3 hrs (Chi-square=10.25,  $df=4$ ,  $p\leq 0.036$ ), 6 hrs (Chi-square=10.27,  $df=4$ ,  $p\leq 0.036$ ) and 24 hrs (Chi-  
385 square=10.25,  $df=4$ ,  $p\leq 0.042$ ) treatment groups differed significantly from one another. More in  
386 particular, both cortisol-treated larvae (3 hrs: Chi-square=5.16,  $df=2$ ,  $p\leq 0.076$ ; 6 hrs: Chi-square=6.94,  
387  $df=2$ ,  $p\leq 0.03$ ; 24 hrs Chi-square=5.77,  $df=2$ ,  $p\leq 0.056$ ) and dexamethasone-treated larvae (6 hrs: Chi-  
388 square=6.98,  $df=2$ ,  $p\leq 0.03$ ; 24 hrs Chi-square=6.53,  $df=2$ ,  $p\leq 0.038$ ) showed less severe changes in  
389 tail fin morphology than control-treated larvae. We did not observe a strong effect of LPS exposure on  
390 the shape of the larvae. After 24 hrs only small percentages of each treatment group showed a curved  
391 shape: control-treated larvae (see supplementary table 2 for all time points): 15.8% ( $n=19$ ); cortisol-  
392 treated larvae: 8.3% ( $n=24$ ); dexamethasone-treated larvae: 9.1% ( $n=22$ ); these differences were not  
393 significant (Chi-square=1.71,  $df=2$ , ns).

394

### 395 *Gene expression analysis*

396 First, we explored the effects of glucocorticoid treatment through the interrelationships of transcript  
397 abundance of genes using PCA. Then in each component, we selected genes of interest of which the  
398 transcript abundance of the different treatments matched the differences in phenotypical changes and  
399 survival that we observed between treatment groups.

400 A PCA revealed three components explaining in total 72.9% of variance (supplementary table  
401 3). The KMO was sufficiently high (0.619) and Bartlett's test of sphericity was highly significant (Chi-  
402 square=303.010, df=55,  $p < 0.001$ ) indicating that the data were adequate for a PCA.

403 The first component, explaining 32.9% of the variance, consisted of the genes of different Toll-  
404 like receptors: *tlr2* (factor loading: 0.677), *tlr4ba* (0.669), *tlr4bb* (0.764), *tlr5a* (0.779) and *tlr5b* (0.838).  
405 The overall pattern of the factor regression scores across time was an inverted U-shape: a two-way  
406 ANOVA (independent factors: time and treatment) for this component revealed a highly significant  
407 effect of time ( $F(3,36)=15.502$ ,  $p < 0.001$ ) with time points 0 hr and 3 hrs having significantly higher  
408 factor regression scores than time points 0.5 hr and 1 hr (Tukey HSD; supplementary Table 3). Only  
409 weak effects were found between the different treatments ( $F(2,36)=3.012$ ,  $p \leq 0.062$ ;  $F(6,36)=2.038$ ,  
410  $p \leq 0.086$ ). The only gene of this component of which the transcript abundance of the different  
411 treatments seemed to match the differences in phenotypical changes and survival was *tlr4bb* (see  
412 supplementary table 4 and figure 7A): transcript abundance increased less strongly over time in  
413 glucocorticoid-medium treated subjects than in control-medium treated subjects.

414 The second component, explaining 23.1% of the variance, consisted of *il1 $\beta$*  (factor loading:  
415 0.940), *myd88* (0.844) and *il10* (0.758). As time progressed factor regression scores increased (two-  
416 way ANOVA (independent factors: treatment and time); time:  $F(3,36)=68.309$ ,  $p < 0.001$ ) with a post-  
417 hoc Tukey HSD revealing that the factor regression scores differed significantly from one another at all  
418 time points (supplementary table 3). The 0-6 hpf control group had increasingly higher factor  
419 regression scores than the 0-6 hpf cortisol treated group and the 0-6 hpf dexamethasone treated  
420 group as time progressed (supplementary table 3; Tukey HSD; treatment:  $F(2,63)=22.664$ ,  $p < 0.001$ ;  
421 treatment\*time:  $F(6,36)=13.491$ ,  $p < 0.001$ ). Of all genes of this component, transcript abundance of the  
422 different treatments seemed to match the differences in phenotypical changes and survival  
423 (supplementary table 4 and figure 7 B-D): transcript abundance increased less strongly over time in  
424 glucocorticoid-medium treated subjects than in control-medium treated subjects.

425 The third component, explaining 16.9% of the variance, consisted of regulators of the immune  
426 response: *cxcr4a* (factor loading: 0.794), *cxcr4b* (0.809) and *ptpn6* (0.799). Overall the factor  
427 regression scores decreased over time: a two-way ANOVA (independent factors: treatment and time)  
428 revealed a highly significant effect of time ( $F(3,36)=4.464$ ,  $p \leq 0.009$ ) with 3 hrs and 0 hr being  
429 significantly different from one another (Tukey HSD). The 0-6 hpf dexamethasone group had lower



430 factor regression scores than the 0-6 hpf control treated group and the 0-6 hpf cortisol treated group  
431 (treatment:  $F(2,36)=11.056$ ,  $p<0.001$ ; treatment\*time:  $F(6,36)=5.571$ ,  $p<0.001$ ). The only gene of this  
432 component of which the transcript abundance of the different treatments seemed to match the  
433 differences in phenotypical changes and survival was *cxcr4a* (see supplementary table 4 and figure  
434 7E): transcript abundance increased in control-medium treated subjects but decreased in  
435 glucocorticoid-medium treated subjects.

436

#### 437 **4. Discussion**

438 The data of this study showed that treatment of zebrafish embryos with cortisol or dexamethasone  
439 during the first six hours after fertilization modulated the function of the immune system and thereby  
440 enhanced survival after an immune challenge. This suggests that in zebrafish maternal stress through  
441 enhancing oocyte cortisol levels and thereby increased GR stimulation leads to an adaptive response  
442 to immune challenges.

443

##### 444 **4.1. Baseline expression of immune-related genes**

445 Hartig and colleagues (2016) have shown that 5-day exposure to (1  $\mu$ M) cortisol in zebrafish  
446 embryos/larvae (0-5 dpf) enhanced baseline expression of immune-related genes such as of *socs3a*,  
447 *mpeg1* and *irg1l* at 5 dpf. Here, we show that exposure at the first six hours of life (0-6 hpf) is already  
448 sufficient to induce enhanced baseline expression of these genes at 5 dpf. As GR is the only  
449 corticosteroid receptor present in these early life stages (Alsop and Vijayan, 2008; Pikulkaew *et al.*,  
450 2010, 2011), this suggests that activation of GR in these early stages is responsible for mediating  
451 these effects. Indeed, we show that 0-6 hpf exposure to the specific GR agonist dexamethasone  
452 enhanced baseline expression of these immune-related genes in 5 dpf larvae as well. This is in  
453 general agreement with data from studies showing that exposure of embryos/larvae to other GR  
454 agonists (for variable time-periods from fertilisation) increased baseline expression of (some of) these  
455 genes (Willi *et al.*, 2018, 2019; Zhao *et al.*, 2016).

456 We have previously observed that 0-6 hpf exposure to cortisol enhanced baseline levels of  
457 cortisol at 5 dpf in larvae of the AB strain but not in larvae of the TL strain (van den Bos *et al.*, 2019).  
458 In addition, we have observed that 0-6 hpf exposure to dexamethasone had no effect on baseline  
459 levels of cortisol at 5 dpf in larvae of the AB or TL strain (Althuisen, 2018). Overall these data suggest

460 that the effects on the expression of immune-related genes in AB and TL larvae are independent of  
461 baseline levels of cortisol.

462 While we have previously observed substantial differences between larvae of the AB and TL  
463 strains in gene expression, physiology and behaviour (van den Bos *et al.*, 2017a, 2017b, 2019, 2020),  
464 the effects of 0-6 hpf exposure to cortisol and dexamethasone on baseline expression of immune-  
465 related genes were similar in both strains. This suggests a robust strain-independent effect. Future  
466 studies should elucidate whether this effect also holds in other strains revealing thereby fundamental  
467 aspects of how early-life levels of cortisol may affect offspring functioning and survival.

468

#### 469 **4.2 Tail fin amputation assay**

470 It has been shown that tail fin amputation in 3 dpf larvae leads to a rapid recruitment of macrophages  
471 (within 2 hpa) remaining at a plateau for at least 24 hours thereafter, while the number of neutrophils  
472 reaches a peak 4 hpa declining thereafter (Chatzopoulou *et al.*, 2016). Here, we observed that  
473 dexamethasone increased the number of neutrophils at 4 hpa, while it had no effect on the number of  
474 macrophages at 4 hpa. These data suggest that pre-exposed subjects mount a stronger response to  
475 injury, possibly enhancing protection against invading micro-organisms (Hall *et al.*, 2014).

476 Dexamethasone, but not cortisol, exposure was effective in increasing the recruitment of  
477 neutrophils. Two explanations may be forwarded for this. First, this may be related to  
478 dexamethasone's higher affinity for GR (Rupprecht *et al.*, 1993). In line with this we observed  
479 enhanced expression of FK506 binding protein 5 (*fkbp5*), a marker for levels of GR stimulation (e.g.  
480 Willi *et al.*, 2018, 2019) in dexamethasone-exposed embryos, but not cortisol-exposed embryos  
481 (Althuisen, 2018; van den Bos *et al.*, 2019). Second, it has been shown neutrophil recruitment, but not  
482 macrophage recruitment, is sensitive to acute treatment with GR agonists, including cortisol, which  
483 decreases the number of neutrophils at 4 hpa (Chatzopoulou *et al.*, 2016; Hall *et al.*, 2014; Xie *et al.*,  
484 2019). We have observed that baseline levels of cortisol are enhanced following cortisol but not  
485 dexamethasone treatment (Althuisen, 2018; van den Bos *et al.*, 2019). Hence, in the case of cortisol  
486 pre-exposure enhancement of neutrophil recruitment through GR stimulation (as indicated by the  
487 effect of dexamethasone) may potentially be offset at 3 dpf by the higher baseline levels of cortisol. If  
488 so, this suggests a fine-tuning of the response. Future studies should address these alternative  
489 explanations.

490

### 491 **4.3 LPS challenge**

492 In line with results from other studies (Dios *et al.*, 2014; Hsu *et al.*, 2018; Novoa *et al.*, 2009; Philip *et*  
493 *al.*, 2017) LPS exposure produced phenotypical changes (tail fin oedema, swollen or damaged tail  
494 fins, and curved animals), mortality and increased expression levels of immune-related genes. To  
495 assess the molecular mechanisms underlying the effects of LPS exposure, we measured the  
496 expression of *cldn5a*, *cldn2* and *oclnb*; genes of which the expression has been shown to be changed  
497 following LPS exposure (Hsu *et al.*, 2018; Philip *et al.*, 2017) and which are involved in endothelial  
498 barrier function (Kása *et al.*, 2015; Odenwald and Turner, 2013; Shen *et al.*, 2011; Yoseph *et al.*,  
499 2016). The strong increase in the expression of *cldn2* at 3 hours in control-treated subjects is in line  
500 with data from other studies (Hsu *et al.*, 2018; Philip *et al.*, 2017). Increased expression of *cldn2* is  
501 associated with endothelial hyper-permeability due to increased pore-pathway activity possibly  
502 mediated by increased expression of IL-13 (Kása *et al.*, 2015; Odenwald and Turner, 2013; Shen *et*  
503 *al.*, 2011; Yoseph *et al.*, 2016). At variance with other studies (Hsu *et al.*, 2018; Philip *et al.*, 2017) we  
504 did not observe strongly decreased expressions of *cldn5a* and *oclnb*. Decreased expression levels of  
505 *cldn5a* and *oclnb* are related to endothelial hyper-permeability due a lower sealing function of the  
506 pore-pathway and a less functional leaky pathway respectively (Kása *et al.*, 2015; Odenwald and  
507 Turner, 2013; Shen *et al.*, 2011; Yoseph *et al.*, 2016). One reason for this may be that we measured  
508 gene expressions at 3 hours after the start of the LPS exposure, while in other studies this was  
509 measured at substantially later time points, i.e. 6 and 8 hours (Hsu *et al.*, 2018; Philip *et al.*, 2017).

510 Both cortisol and dexamethasone exposure at 0-6 hpf were associated with milder effects to  
511 LPS exposure (in both experiments), as indicated by milder phenotypical changes (lower number of  
512 larvae expressing tail fin oedema, damaged tail fins or curved animals), lower mortality and lower  
513 gene expression of immune-related genes, such as *il1 $\beta$* . As to the expression of endothelium-related  
514 genes we noted that the expression of *cldn5a* was higher and expression of *cldn2* lower in cortisol-  
515 and dexamethasone-treated subjects compared to control-treated subjects. This suggests a lower  
516 permeability of the endothelium due to a lower pore-pathway activity (Kása *et al.*, 2015; Odenwald and  
517 Turner, 2013; Shen *et al.*, 2011; Yoseph *et al.*, 2016) supporting the milder phenotypical effects  
518 following LPS exposure. The expression of *oclnb* was strongly increased after three hours in 0-6 hpf  
519 cortisol-treated and dexamethasone-treated subjects compared to control-treated subjects. This

520 suggests lower permeability due to more protective leaky pathway activity (Kása *et al.*, 2015;  
521 Odenwald and Turner, 2013; Shen *et al.*, 2011; Yoseph *et al.*, 2016). It has been shown that 24 hours  
522 following LPS challenge in zebrafish larvae the expression of *oclnb* is strongly up-regulated facilitating  
523 tissue-repair (Hsu *et al.*, 2018). Again, the data support the milder phenotypical effects that we see  
524 following LPS exposure in cortisol-treated and dexamethasone-treated subjects compared to control-  
525 treated subjects.

526 To explore the underlying mechanisms of glucocorticoid treatment we measured the  
527 expression of a series of genes of interest and related their expression to the outcome of the  
528 phenotypical changes and mortality. Five genes stood out in this respect, reflecting two receptors  
529 (*tlr4bb* and *cxcr4a*), a factor involved in the transduction pathway of the expression of cytokines  
530 (*myd88*) and two cytokines (*il1 $\beta$*  and *il10*).

531 While LPS exerts its effects through transduction mechanisms following binding to TLR4 in  
532 mammals (Goulopoulou *et al.*, 2015; Kása *et al.*, 2015), in zebrafish this is not clear as yet: *tlr4ba* and  
533 *tlr4bb* have been suggested to be paralogues rather than homologues and TLR4BA and TLR4BB  
534 have thus far not been shown to be activated by LPS possibly by lack of a binding site for LPS  
535 (Sepulcre *et al.*, 2009; Sullivan *et al.*, 2009). However TLR4BB has been shown to be involved in  
536 inflammatory processes as *tlr4bb* transcript abundance is increased following tail fin amputation  
537 (Chatzopoulou *et al.*, 2016). Here, we observed an increase in *tlr4bb* expression in 0-6 hpf control-  
538 treated subjects over time, accompanied by a strong inflammatory response, which was less strong in  
539 0-6 hpf cortisol-treated or dexamethasone-treated subjects, accompanied by a milder inflammatory  
540 response. This suggests a role for TLR4BB in the LPS-induced response.

541 In humans CXCR4 has been implicated in recognition of LPS or being part of a 'LPS sensing  
542 apparatus' in addition to TLR4 (Triantafilou *et al.*, 2001, 2008). Furthermore, LPS increases the  
543 expression of *cxcr4* through an NF- $\kappa$ B signalling pathway associated with increased micro-vascular  
544 leakage in the lungs (Konrad *et al.*, 2017) or increased colorectal tumor metastasis (Liu *et al.*, 2017).  
545 Here, we observed an increase in *cxcr4a* expression in 0-6 hpf control-treated subjects over time,  
546 which was absent in 0-6 hpf cortisol-treated or dexamethasone-treated subjects. This difference in  
547 gene expression may be associated with differences in the extent of vascular leakage as suggested  
548 by the differences in the expression of genes involved in the endothelial barrier and differences in tail  
549 fin oedema between treatments as discussed above. In zebrafish *cxcr4a* is found in endothelial cells

550 (blood vessels), while *cxcr4b* is not (Wei Chong *et al.*, 2001), which may explain that we only observed  
551 a phenotype-related effect for the expression profile of *cxcr4a*. Interestingly, CXCR4 has been  
552 implicated in the development of tolerance to lethal doses of LPS in zebrafish larvae (Dios *et al.*, 2014;  
553 Novoa *et al.*, 2009). Thus, this suggests that CXCR4 is involved in modulating the response to LPS.

554 Overall therefore our data warrant further studies into the role of TLR4BB and CXCR4 in LPS-  
555 induced sepsis in zebrafish as well as into the effects of early life glucocorticoid stimulation hereon.

556 Earlier studies have shown that MYD88 knockout larvae show enhanced survival to LPS  
557 challenge (Hsu *et al.*, 2018) and no increase in *il1 $\beta$*  expression (van der Vaart *et al.*, 2013). Lethal, but  
558 not sub-lethal, doses of LPS have been found to be associated with high expression levels of *il1 $\beta$*  and  
559 *il10* in zebrafish larvae, indicative of a hyper-inflammatory response (Dios *et al.*, 2014). In line with  
560 these findings we observed that the expression levels of *myd88*, *il1 $\beta$*  and *il10* were strongly increased  
561 3 hours after LPS challenge associated with low survival in 0-6 hpf control-treated subjects, but lower  
562 levels of expression of all three genes with higher survival in 0-6 hpf cortisol-treated and  
563 dexamethasone-treated subjects. Myd88 is an adaptor protein critical to toll-like receptor signalling  
564 (except for TLR3; Goulopoulou *et al.*, 2016) and IL1 $\beta$  receptor signalling (see Kanwal *et al.*, 2013; van  
565 der Vaart *et al.*, 2013) and thereby cytokine expression. It should be noted that *myd88* expression was  
566 already low in 0-6 hpf cortisol-treated and dexamethasone-treated subjects, suggesting lower  
567 transduction pathway activity, possibly leading to a lower stimulation of inflammatory pathways. It is  
568 clear that this deserves further study.

569 As indicated above following cortisol or dexamethasone treatment at 0-6 hpf we noted  
570 increased base-line expression levels of *irg1l*, *socs3a*, *mpeg1.1* and *mpeg1.2* compared to control  
571 treatment at 0-6 hpf. These increased base-line levels may aid in increased clearance of bacteria and  
572 preventing excessive inflammation and hence aid in increasing survival (Benard *et al.*, 2015; Hall *et*  
573 *al.*, 2014; Jo *et al.*, 2005).

574 The data of LPS exposure in larvae observed here seem to match the data of LPS exposure  
575 in adult zebrafish following 0-5 dpf exposure to cortisol: LPS exposure did not increase *il1 $\beta$*  expression  
576 in different tissues measured (Hartig *et al.*, 2016). Unfortunately no survival was measured in the latter  
577 study.

578 Overall these data suggest that the response to LPS of subjects pre-exposed to cortisol or  
579 dexamethasone is less strong than the response of subjects of pre-exposed to control medium. How

580 differences in survival, phenotype and gene-expression levels are causally related remains to be  
581 studied. As we have observed that 0-6 hpf exposure to dexamethasone had no effect on baseline  
582 levels of cortisol at 5 dpf in larvae of the AB strain (Althuizen, 2018), the data suggest that these  
583 effects are independent of baseline levels of cortisol.

584

#### 585 **4.4 Limitations**

586 A clear limitation is that we only used one dose of cortisol and dexamethasone. For convenience we  
587 used equimolar doses of cortisol and dexamethasone, which may have led to different levels of  
588 stimulation of GR 0-6 hpf. Thus, in future studies different dose-ranges may be warranted, e.g. to  
589 study whether higher concentrations of cortisol in the tail fin amputation assay have an effect on  
590 neutrophil recruitment.

591         Regarding the tail fin amputation assay it has been shown that glucocorticoids may play a role  
592 in the differentiation of macrophages into a pro-inflammatory (M1) phenotype (Xie *et al.*, 2019). So,  
593 future studies should study in more detail the effects of early life exposure of glucocorticoids on the  
594 inflammatory response and wound healing. Similarly, we used LPS to induce a hyper-inflammatory  
595 response, i.e. sepsis (Hsu *et al.*, 2018; Philip *et al.*, 2017), as a model to study the effectiveness of our  
596 early life treatments. To assess the ecological relevance of our findings and their more general nature  
597 the effects of early-life exposure on larval exposure to different pathogens, such as of bacterial, viral or  
598 fungal origin, should be studied (see e.g. Meijer and Spaink, 2011; van der Vaart *et al.*, 2013).

599         We observed a variable response to the LPS challenge in the two exposure series. This is not  
600 uncommon as we also observed variable responses in other immune-related paradigms such as the  
601 response to a dextran sodium sulphate (DSS) challenge (van den Bos *et al.*, unpublished  
602 observations). While as yet speculative differences in baseline levels of expression of *il1 $\beta$*  may be one  
603 associated factor as we observed that higher baseline levels seem associated with milder responses  
604 to LPS (van den Bos *et al.*, unpublished data). This is not unprecedented as this has also been  
605 observed in mice: enhanced levels of IL1 are associated with a milder response to LPS (Alves-Rosa *et al.*  
606 *et al.*, 2002). It has been shown that following hatching *il1 $\beta$*  expression increases due to exposure to  
607 microbes in the medium (Galindo-Villegas *et al.*, 2012). This tunes the activity of the innate immune  
608 system of the zebrafish larvae and determines thereby their disease resistance. In the laboratory  
609 however this may lead to variation between experimental series as the microbial load of the medium

610 may vary from experimental series to series. It is clear that this warrants further studies. It has been  
611 suggested that tuning the innate immune system occurs through chromatin modifications (see e.g.  
612 Foster *et al.*, 2007; Galindo-Vargas *et al.*, 2012; Netea *et al.*, 2016, 2017). Our future studies are  
613 directed at understanding the variable responses in this context.

614         The immune system affects HPI-axis activity and *vice versa* (Wendelaar Bonga, 1997).  
615 However, we did not address changes in HPI-axis activity as a consequence of our procedures (tail fin  
616 amputation or LPS exposure) in this study as the primary aim was to study whether our pre-treatments  
617 would affect immune function. Still changes in HPI-axis activity may be anticipated. For example, a  
618 recent study showed in European sea bass (*Dicentrarchus labrax*) larvae 5 day post-hatching that at  
619 120 hours following infection with the bacterium *Vibrio anguillarum*, when mortality was already high,  
620 HPI-axis activity increased (Reyes-López *et al.*, 2018). This increased activity coincided with  
621 increased expression of pro-inflammatory and anti-inflammatory genes. While the underlying  
622 mechanism was not clear as yet, the data show that infections may impact HPI-axis activity. It has  
623 been shown that early-life exposure to cortisol dampens the response of the HPI-axis to stressors in  
624 zebrafish larvae (Nesan and Vijayan, 2016). Hence, future studies should address how early-life  
625 exposure to cortisol affects the relationship between immune function and HPI-axis activity, and how  
626 this relates to the increased survival that we have observed here.

627         We have used 0-6 hpf cortisol exposure by the medium as a model or proxy of increased  
628 oocyte levels of cortisol due to chronic stress in mothers (van den Bos *et al.*, 2019), while others have  
629 used micro-injection of cortisol in the yolk of single-cell embryos (Best *et al.*, 2017; Nesan and Vijayan,  
630 2012, 2016). Chronic stress, whether due to excessive predation, food shortage, crowding or out-of-  
631 range-temperatures, is associated with increased levels of cortisol (Wendelaar Bonga, 1997) and at  
632 this level these procedures may be a valid approach of mimicking maternal stress. Still, these different  
633 stressors may have additional neuro-endocrine and/or metabolic signatures that affect oocyte yolk-sac  
634 contents and hence thereby development of embryos and larvae. Thus, future experiments should  
635 compare the current results to data from chronically stressed mothers using different types of  
636 stressors.

637

#### 638 **4.5 Conclusion**

639 These data show that early-life exposure to cortisol, as a model or proxy of maternal stress, induces  
640 an adaptive response to immune challenges, which seems mediated via the glucocorticoid receptor.  
641 These data are of relevance for both ecological research (Sopinka *et al.*, 2017) and biomedical  
642 research (Stewart *et al.*, 2014) in understanding the effects of stressful conditions and exposure to  
643 endocrine disruptors on disease susceptibility and survival of offspring.

644

## 645 **5. Acknowledgements**

646 We acknowledge Tom Spanings, Antoon van der Horst and Jeroen Boerrigter (Radboud University)  
647 and Guus van der Velden, Ulrike Nehrdich and Ruth van Koppen (Leiden University) for excellent fish  
648 care.

649

## 650 **6. Conflict of interest**

651 The authors have no conflict of interest to report.

652

## 653 **7. Funding**

654 The authors received no specific funding for this research.

655

## 656 **8. Contributions**

657 RvdB and MS conceived the project. SC, KT, JA and RW performed experiments. RvdB, SC, KT, JA  
658 and RW analysed data. JZ and SC performed qPCR analysis. RvdB, GF and MS wrote the  
659 manuscript.

660

661



662 **9. References**  
663

- 664 Alderman SL, Bernier NJ (2009) Ontogeny of the corticotropin-releasing factor system in zebrafish.  
665 *General and Comparative Endocrinology* **164**: 61–69. (doi:10.1016/j.ygcen.2009.04.007)  
666
- 667 Alsop D, Vijayan MM (2008). Development of the corticosteroid stress axis and receptor expression in  
668 zebrafish. *American Journal of Physiology-Regulatory, Integrative and Comparative Physiology*,  
669 **294(3)**: R711-R719.  
670
- 671 Althuisen J (2018). Development in AB and TL zebrafish (*Danio rerio*) is affected by early-life  
672 exposure to cortisol and dexamethasone. MSc thesis Radboud University  
673
- 674 Alves-Rosa F, Vulcano M, Beigier-Bompadre M, Fernandez G, Palermo M, Isturiz MA (2002)  
675 Interleukin-1b induces in vivo tolerance to lipopolysaccharide in mice *Clinical and Experimental*  
676 *Immunology* **128**:221–228  
677
- 678 Benard EL, Racz PI, Rougeot J, Nezhinsky AE, Verbeek FJ, Spaink HP, Meijer AM (2015)  
679 Macrophage-expressed perforins Mpeg1 and Mpeg1.2 have an anti-bacterial function in zebrafish.  
680 *Journal of Innate Immunology* **7**: 136–152. doi: 10.1159/000366103.  
681
- 682 Bernut A, Herrmann J-L, Kissa K, Dubremetz J-F, Gaillard J-L, Lutfalla G, Kremer L. (2014)  
683 Mycobacterium abscessus cording prevents phagocytosis and promotes abscess formation.  
684 *Proceedings of the National Academy of Sciences USA* **111(10)**: E943–E952.  
685
- 686 Best C, Kurrasch DM, Vijayan MM (2017). Maternal cortisol stimulates neurogenesis and affects larval  
687 behaviour in zebrafish. *Scientific reports* **7**.  
688
- 689 Budaev SV (2010) Using Principal Components and Factor Analysis in animal behaviour research:  
690 caveats and guidelines. *Ethology* **116** 472–480. (doi:10.1111/j.1439-0310.2010.01758.x).  
691

692 Champagne DL, Hoefnagels CCM, de Kloet RE, Richardson MK (2010) Translating rodent behavioral  
693 repertoire to zebrafish (*Danio rerio*): relevance for stress research. *Behavioural Brain Research* **214**:  
694 332–342.  
695  
696 Chatzopoulou A, Heijmans JPM, Burgerhout E, Oskam N, Spaik HP, Meijer AH, Schaaf MJM (2016)  
697 Glucocorticoid-induced attenuation of the inflammatory response in zebrafish. *Endocrinology* **157(7)**:  
698 2772–2784  
699  
700 Dai Y-J, Ji Y-F, Chen N, Bian W-P, Li Q-K, Ma Y-B, Chen Y-L, Pei D-S (2014). Zebrafish as a model  
701 system to study toxicology. *Environmental Toxicology and Chemistry* **33 (1)**: 11–17.  
702  
703 Dios S, Balseiro P, Costa MM, Romero A, Boltanã S, Roher N, Mackenzie S, Figueras A, Novoa B  
704 (2014) The involvement of cholesterol in sepsis and tolerance to lipopolysaccharide highlighted by the  
705 transcriptome analysis of zebrafish (*Danio rerio*). *Zebrafish* **11**: 421-433.  
706  
707 Ferguson GA 1989 *Statistical Analysis in Psychology and Education*. McGraw Hill; Columbus.  
708  
709 Foster SL, Hargreaves DC, Medzhitov R (2007) Gene-specific control of inflammation by TLR-induced  
710 chromatin modifications. *Nature* **447**: 972–978.  
711  
712 Galindo-Villegas J, Garcia-Moreno D, de Oliveira S, Meseguer J, Mulero V. (2012) Regulation of  
713 immunity and disease resistance by commensal microbes and chromatin modifications during  
714 zebrafish development. *Proceedings of the National Academy of Sciences USA* **109(39)**: E2605–14.  
715 doi:10.1073/pnas.1209920109  
716  
717 Gorissen M, Flik G (2016). The Endocrinology of the stress response in fish: An adaptation-  
718 physiological View. In *Biology of Stress in Fish*, pp 75–110. Eds CB Schreck, L Tort, AP Farrell & CJ  
719 Brauner. Academic Press; London.  
720

- 721 Goulopoulou S, McCarthy SG, Webb RC (2016) Toll-like receptors in the vascular system: sensing the  
722 dangers within. *Pharmacological Reviews* **68**:142–167.  
723
- 724 Hall CJ, Boyle RH, Sun X, Wicker SM, Misa JP, Krissansen GW, et al. (2014) Epidermal cells help  
725 coordinate leukocyte migration during inflammation through fatty acid-fuelled matrix metalloproteinase  
726 production. *Nature Communications* **5**: 3880. doi:10.1038/ncomms4880  
727
- 728 Hartig EI, Zhu S, King BL, Coffman JA (2016). Cortisol-treated zebrafish embryos develop into pro-  
729 inflammatory adults with aberrant immune gene regulation. *Biology Open*, bio-020065.  
730
- 731 Hsu AY, Gurol T, Sobreira TJP, Zhang S, Moore N, Cai C, Zhang Z-Y, Deng Q (2018) Development  
732 and characterization of an endotoxemia model in zebrafish. *Frontiers in Immunology* **9**:607. doi:  
733 10.3389/fimmu.2018.00607  
734
- 735 Jo D, Liu D, Yao S, Collins RD, Hawiger J (2005) Intracellular protein therapy with SOCS3 inhibits  
736 inflammation and apoptosis. *Nature Medicine* **11**: 892-898  
737
- 738 Kanwal Z, Zakrzewska A, den Hertog J, Spaank HP, Schaaf MJM, Meijer AH (2013) Deficiency in  
739 hematopoietic phosphatase Ptpn6/Shp1 hyperactivates the innate embryos immune system and  
740 impairs control of bacterial infections in zebrafish. *The Journal of Immunology* **190**: 1631-1645.  
741
- 742 Kása A, Csontos C, Verin AD (2015) Cytoskeletal mechanisms regulating vascular endothelial barrier  
743 function in response to acute lung injury. *Tissue Barriers* **3**:1-2, e974448.  
744
- 745 Konrad FM, Meichssner, N, Bury A, Ngamsri K-C, Reutershan J (2017) Inhibition of SDF-1 receptors  
746 CXCR4 and CXCR7 attenuates acute pulmonary inflammation via the adenosine A2B-receptor on  
747 blood cells. *Cell Death and Disease* **8**: e2832; doi:10.1038/cddis.2016.482.  
748
- 749 Liu Y-W (2007). Interrenal organogenesis in the zebrafish model. *Organogenesis* **3**: 44–48.  
750

- 751 Liu W-T, Jing Y-Y, Yan F, Han Z-P, Lai F-B, Zeng J-X, Yu G-F, Fan Q-M, Li R, Zhao Q-D, Wu M-C,  
752 Wei L-X (2017) LPS-induced CXCR4-dependent migratory properties and a mesenchymal-like  
753 phenotype of colorectal cancer cells. *Cell Adhesion and Migration* **11**: 13–23.  
754
- 755 Reyes-López FE, Aerts J, Vallejos-Vidal E, Ampe B, Dierckens K, Tort L and Bossier P (2018)  
756 Modulation of innate immune-related genes and glucocorticoid synthesis in gnotobiotic full-sibling  
757 European sea bass (*Dicentrarchus labrax*) larvae challenged with *Vibrio anguillarum*. *Frontiers in*  
758 *Immunology* **9**:914. doi: 10.3389/fimmu.2018.00914.  
759
- 760 McEwen BS, Wingfield JC (2003). The concept of allostasis in biology and biomedicine. *Hormones*  
761 *and Behaviour* **43**: 2–15.  
762
- 763 Meijer AH, Spaink HP (2011). Host-pathogen interactions made transparent with the zebrafish model.  
764 *Current Drug Targets* **12**: 1000-1017.  
765
- 766 Nesan D, Vijayan MM (2012). Embryo exposure to elevated cortisol level leads to cardiac  
767 performance dysfunction in zebrafish. *Molecular and Cellular Endocrinology* **363(1)**: 85-91.  
768
- 769 Nesan D, Vijayan MM (2013). Role of glucocorticoid in developmental programming: evidence from  
770 zebrafish. *General and Comparative Endocrinology* **181**: 35-44  
771
- 772 Nesan D, Vijayan MM (2016). Maternal cortisol mediates hypothalamus-pituitary-interrenal axis  
773 development in zebrafish. *Scientific Reports* **6**: 22582.  
774
- 775 Netea MG, Joosten LAB, Latz E, Mills KHG, Natoli G, Stunnenberg HG, O'Neill LAJ, Xavier RJ (2016)  
776 Trained immunity: A program of innate immune memory in health and disease. *Science* **352**, aaf1098  
777 (2016). DOI: 10.1126/science.aaf1098  
778
- 779 Netea MG, van der Meer JWM (2017) Trained immunity: an ancient way of remembering. *Cell and*  
780 *Host Microbe* **21**: 297-300

781  
782 Nova B, Bowman TV, Zon L, Figueras A (2009) LPS response and tolerance in the zebrafish (*Danio*  
783 *rerio*) *Fish and Shellfish Immunology* **26(2)**: 326–31. doi:10.1016/j.fsi.2008.12.004  
784  
785 Odenwald MA, Turner JR (2013) Intestinal permeability defects: Is it time to treat? *Clinical*  
786 *Gastroenterology and Hepatology* **11(9)**: 1075–1083. doi:10.1016/j.cgh.2013.07.001.  
787  
788 Philip AM, Wang Y, Mauro A, El-Rass S, Marshall JC, Lee WL, et al. (2017) Development of a  
789 zebrafish sepsis model for high-throughput drug discovery. *Molecular Medicine* **23**: 134–48.  
790 doi:10.2119/molmed.2016.00188  
791  
792 Pikulkaew S, Benato F, Celeghein A, Zucal C, Skobo T, Colombo L, Dalla Valle L (2011). The  
793 knockdown of maternal glucocorticoid receptor mRNA alters embryo development in zebrafish.  
794 *Developmental Dynamics* **240(4)**: 874-889.  
795  
796 Pikulkaew S, De Nadai A, Belvedere P, Colombo L, Dalla Valle L (2010). Expression analysis of  
797 steroid hormone receptor mRNAs during zebrafish embryogenesis. *General and Comparative*  
798 *Endocrinology* **165(2)**: 215-220.  
799  
800 Renshaw SA, Loynes CA, Trushell DMI, Elworthy S, Ingham PW, Whyte MKB. (2006) A transgenic  
801 zebrafish model of neutrophilic inflammation. *Blood* **108(13)**: 3976–8.  
802  
803 Roehl HH (2018). Linking wound response and inflammation to regeneration in the zebrafish larval fin.  
804 *International Journal of Developmental Biology* **62**: 473-477. doi:10.1387/ijdb.170331hr  
805  
806 Rupprecht R, Reul JM, van Steensel B, Spengler D, Söder M, Berning B, Holsboer F, Damm K  
807 (1993). Pharmacological and functional characterization of human mineralocorticoid and glucocorticoid  
808 receptor ligands. *European Journal of Pharmacology - Molecular Pharmacology Section*, **247**: 145-  
809 154.  
810

- 811 Shen L, Weber CR, Raleigh DR, Yu D, Turner JR (2011) Tight junction pore and leak pathways: A  
812 dynamic duo. *Annual Reviews in Physiology* **73**: 283–309. doi:10.1146/annurev-physiol-012110-  
813 142150.
- 814
- 815 Sepulcre MP, Alcaraz-Perez F, López-Muñoz A, Roca FJ, Meseguer J., Cayuela ML, Mulero V (2009)  
816 Evolution of lipopolysaccharide (LPS) recognition and signaling: fish TLR4 does not recognize LPS  
817 and negatively regulates NF- $\kappa$ B activation. *The Journal of Immunology* **182**: 1836–1845.
- 818
- 819 Sopinka NM, Capelle PM, Semeniuk CAD, Love OP (2017) Glucocorticoids in fish eggs: Variation,  
820 interactions with the environment, and the potential to shape offspring fitness. *Physiological and*  
821 *Biochemical Zoology* **90(1)**: 15–33.
- 822
- 823 Steenbergen PJ, Richardson MK, Champagne DL (2011). The use of the zebrafish model in stress  
824 research. *Progress in Neuropsychopharmacology and Biological Psychiatry* **35**: 1432–1451.
- 825
- 826 Steenbergen PJ, Bardine N & Sharif F (2017). Kinetics of glucocorticoid exposure in developing  
827 zebrafish: A tracer study. *Chemosphere* **183**: 147-155.
- 828
- 829 Stewart AM, Braubach O, Spitsbergen J, Gerlai R, Kalueff AV (2014). Zebrafish models for  
830 translational neuroscience research: from tank to bedside. *Trends in Neurosciences* **37**: 264–278.  
831 (doi:10.1016/j.tins.2014.02.011)
- 832
- 833 Sullivan C, Charette J, Catchen J, Lage CR, Giasson G, Postlethwait JH, Willard PJ, Kim CH (2009)  
834 The gene history of zebrafish tlr4a and tlr4b is predictive of their divergent functions. *The Journal of*  
835 *Immunology* **183**: 5896-5908;
- 836
- 837 Triantafilou K, Triantafilou M, Dedrick RL (2001) A CD14-independent LPS receptor cluster. *Nature*  
838 *Immunology* **4**: 338–345.
- 839

- 840 Triantafilou M, Lepper PM, Briault CD, Ahmed MAE, Dmochowski JM, Schumann C, Triantafilou K  
841 (2008) Chemokine receptor 4 (CXCR4) is part of the lipopolysaccharide “sensing apparatus”.  
842 *European Journal of Immunology* **38**: 192–203  
843
- 844 Vandesompele J, De Preter K, Pattyn F, Poppe B, Van Roy N, De Paepe A, Speleman F (2002).  
845 Accurate normalization of real-time quantitative RT-PCR data by geometric averaging of multiple  
846 internal control genes. *Genome Biology* **3**. (doi:10.1186/gb-2002-3-7-research0034)  
847
- 848 Van der Vaart M, van Soest JJ, Spaink HP, Meijer AH (2013) Functional analysis of a zebrafish myd88  
849 mutant identifies key transcriptional components of the innate immune system. *Disease Models &*  
850 *Mechanisms* **6**: 841-854 doi:10.1242/dmm.010843.  
851
- 852 Van den Bos R, Mes W, Galligani P, Heil A, Zethof J, Flik G, Gorissen M (2017a). Further  
853 characterisation of differences between TL and AB zebrafish (*Danio rerio*): Gene expression,  
854 physiology and behaviour at day 5 of the larval stage. *PLoS ONE* **12(4)**: e0175420.  
855
- 856 Van den Bos R, Zethof J, Flik G, Gorissen M (2017b). Light regimes differentially affect baseline  
857 transcript abundance of stress-axis and (neuro)development-related genes in zebrafish (*Danio rerio*,  
858 Hamilton 1822) AB and TL larvae. *Biology Open* **6**: 1692-1697 doi:10.1242/bio.028969.  
859
- 860 Van den Bos R, Althuizen J, Tschigg K, Bomert M, Zethof J, Flik G, Gorissen M (2019) Early life  
861 exposure to cortisol in zebrafish (*Danio rerio*): similarities and differences in behaviour and physiology  
862 between larvae of the AB and TL strains. *Behavioural Pharmacology* **30**: 260–271  
863
- 864 Van den Bos R, Flik G, Gorissen M (2020). Behavioural research in zebrafish (*Danio rerio*): strain as  
865 source of variation. In: R. Gerlai (Editor) Behavioral and Neural Genetics of Zebrafish. Amsterdam:  
866 Elsevier (in press)  
867
- 868 Van den Bos, R. (2019). Effects of early life glucocorticoid exposure on metabolism in zebrafish  
869 (*Danio rerio*) larvae. BioRxiv <https://www.biorxiv.org/content/10.1101/2019.12.16.877654v1>

870

871

872 Wendelaar Bonga SE (1997) The stress response in fish. *Physiological Reviews* **77**: 591–625.

873

874 Wei Chong S, Emelyanov A, Gong Z, Korzh V (2001) Expression pattern of two zebrafish genes,  
875 *cxcr4a* and *cxcr4b*. *Mechanisms of Development* **109**: 347–354

876

877 Willi RA, Faltermann S, Hettich T, Fent K (2018). Active glucocorticoids have a range of important  
878 adverse developmental and physiological effects on developing zebrafish embryos. *Environmental*  
879 *Science & Technology* **52(2)**: 877-885.

880

881 Willi RA, Salgueiro-González N, Carcaiso G, Fent, K. (2019) Glucocorticoid mixtures of fluticasone  
882 propionate, triamcinolone acetonide and clobetasol propionate induce additive effects in zebrafish  
883 embryos. *Journal of Hazardous Materials* **374**:101–109.

884

885 Wilson KS, Matrone G, Livingstone DEW, Al-Dujaili EAS, Mullins JJ, Tucker CS, Hadoke PWF,  
886 Kenyon CJ, Denvir MA (2013). Physiological roles of glucocorticoids during early embryonic  
887 development of the zebrafish (*Danio rerio*). *The Journal of Physiology* **591(24)**: 6209-6220.

888

889 Xie Y, Tolmeijer S, Oskam JM, Tonkens T, Meijer AH, Schaaf MJM (2019) Glucocorticoids inhibit  
890 macrophage differentiation towards a pro-inflammatory phenotype upon wounding without affecting  
891 their migration. *Disease Models & Mechanisms* **12**, dmm037887. doi:10.1242/dmm.037887

892

893 Yoseph BP, Klingensmith NJ, Liang Z, Breed EL, Burd EM, Mittal R, Dominguez JA, Petrie B, Ford  
894 ML, Coopersmith CM (2016) Mechanisms of intestinal barrier dysfunction in sepsis. *Shock* **46(1)**: 52–  
895 59. doi:10.1097/SHK.0000000000000565

896

897 Zhao Y, Zhang K, Fent K (2016) Corticosteroid fludrocortisone acetate targets multiple end points  
898 in zebrafish (*Danio rerio*) at low concentrations. *Environmental Science & Technology* **50**:

899 10245–10254 DOI: 10.1021/acs.est.6b03436



900  
901  
902

903 **10. Legends figures**

904

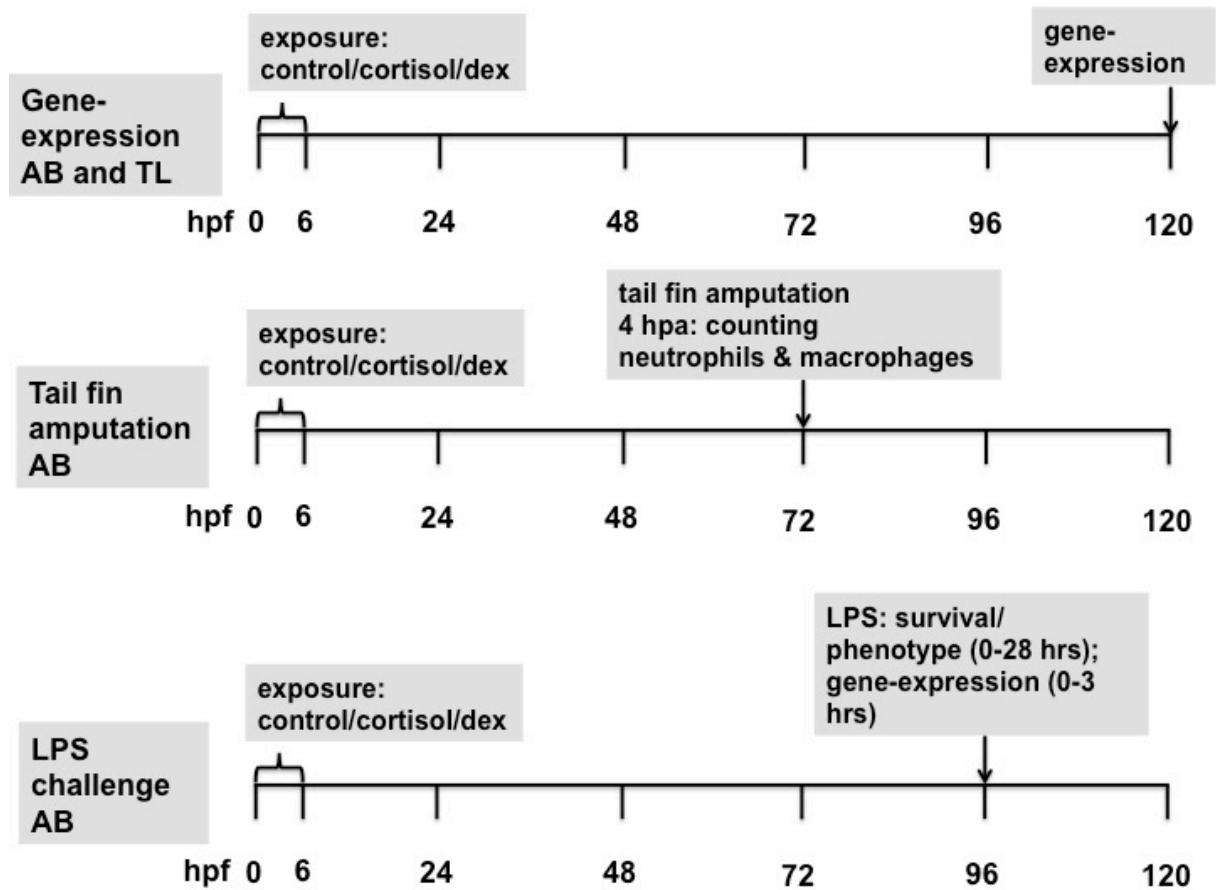

905

906 **Figure 1:** Experimental time-line of the different experiments.

907 dex=dexamethasone

908

909

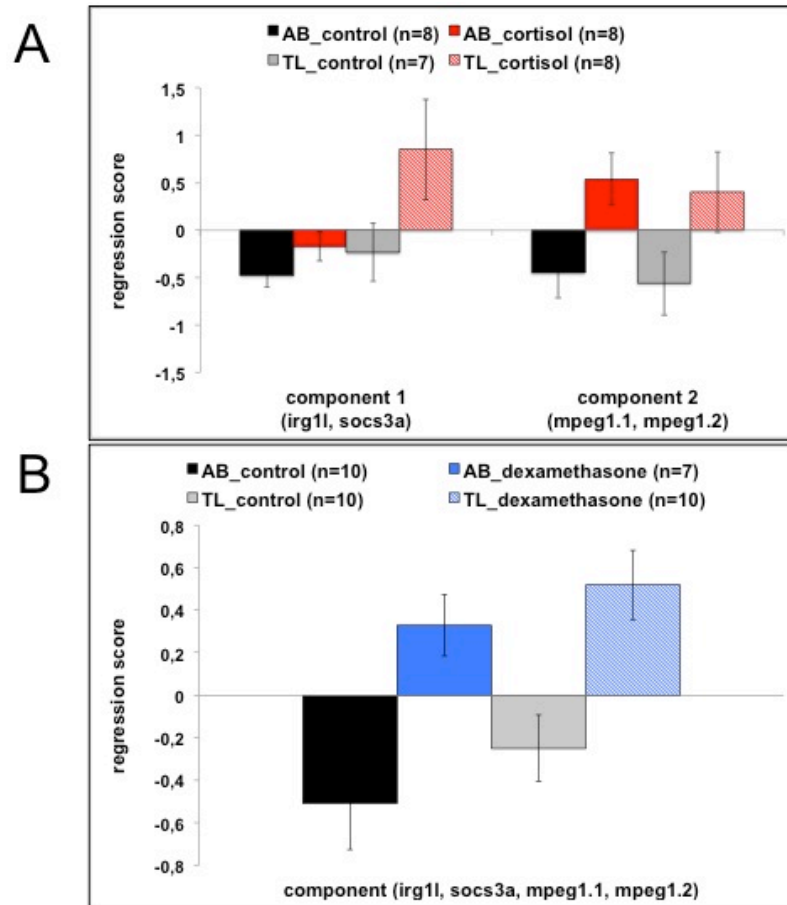

910  
911 **Figure 2, panel A:** Regression scores (mean± SEM) of components 1 and 2 from the PCA for the  
912 different treatments (cortisol or control) and strains (AB or TL). Genes that contributed to the  
913 components are indicated in the figure. One subject was removed from the statistical analyses (TL  
914 control) as it was a consistent outlier following Grubb's outlier test.

915 **Figure 2, panel B:** Regression scores (mean± SEM) of the only component of the PCA for the  
916 different treatments (dexamethasone or control) and strains (AB or TL). Genes that contributed to the  
917 component are indicated in the figure.

918

919

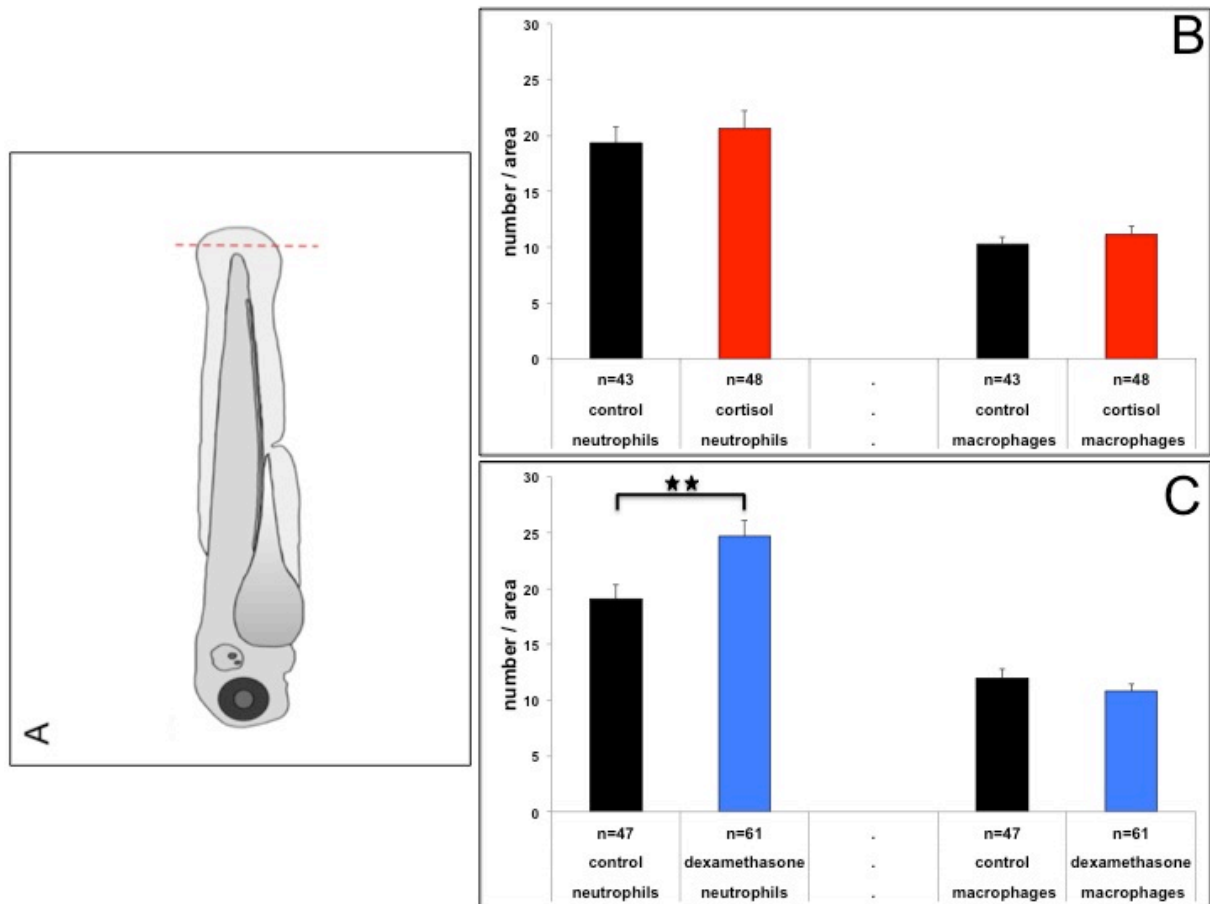

920  
921 **Figure 3, panel A** Picture that illustrates the position of the site of the tail fin amputation in 3 dpf  
922 larvae.

923 **Figure 3, panel B:** Number of neutrophils and macrophages (mean± SEM) at 4 hpa for the different  
924 treatments (cortisol or control).

925 **Figure 3, panel C:** Number of neutrophils and macrophages (mean± SEM) at 4 hpa for the different  
926 treatments (dexamethasone or control).

927

928

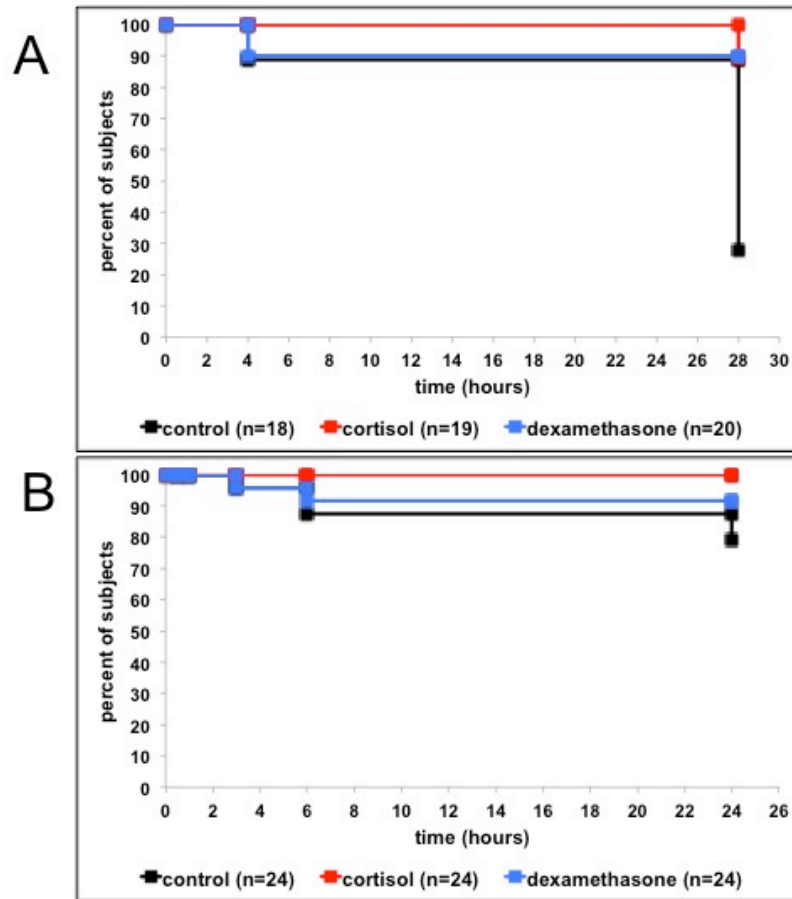

929

930 **Figure 4, panel A:** Per cent of surviving larvae following LPS treatment (from 0-0.5 hrs) and 0-6 hpf  
931 control treatment, cortisol treatment or dexamethasone treatment in the first exposure series (time-  
932 points: 0 hr, 4 hrs and 28 hrs).

933 **Figure 4, panel B:** Per cent of surviving larvae following LPS treatment (from 0-0.5 hrs) and 0-6 hpf  
934 control treatment, cortisol treatment and dexamethasone treatment in second exposure series (time-  
935 points: 0hr, 0.5 hr, 1 hr, 3 hrs, 6 hrs and 24 hrs).

936

937

A

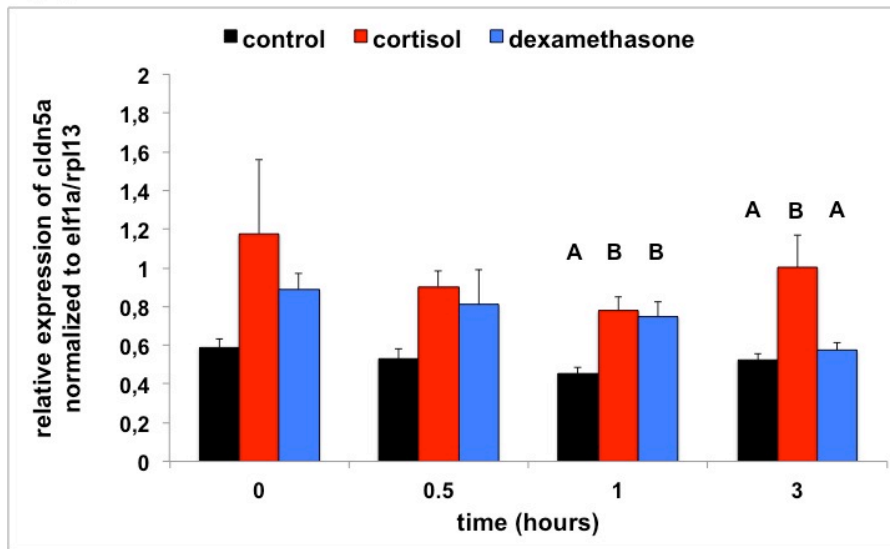

938

939 **Figure 5, panel A:** Transcript abundance (relative normalized expression; mean+SEM) of *cldn5a*  
940 following LPS treatment (from 0-0.5 hr) and 0-6 hpf control treatment, cortisol treatment or  
941 dexamethasone treatment (n=4 samples per time-point). Groups with the same capitals do not  
942 significantly differ from one another (Tukey HSD following a significant treatment effect for this time-  
943 point). Note: control-treated subjects showed no significant change over time:  $F(3,12)=2.009$ , ns.

B

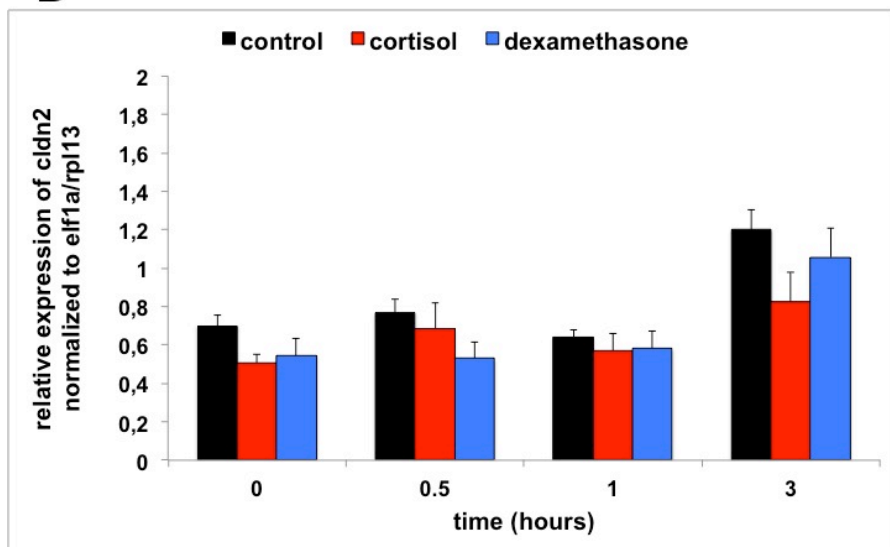

944

945 **Figure 5, panel B:** Transcript abundance (relative normalized expression; mean+SEM) of *cldn2*  
946 following LPS treatment (from 0-0.5 hr) and 0-6 hpf control treatment, cortisol treatment or  
947 dexamethasone treatment (n=4 samples per time-point). Note: control-treated subjects showed an  
948 increased expression at 3 hrs:  $F(3,12)=13.253$ ,  $p<0.001$ ; Tukey HSD.  
949

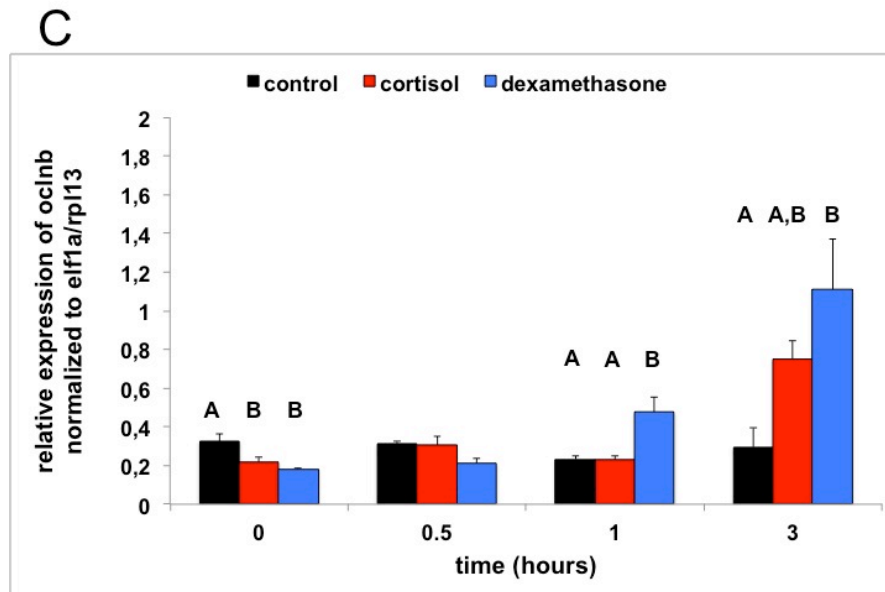

950

951

952 **Figure 5, panel C:** Transcript abundance (relative normalized expression; mean+SEM) of *oclnb*  
953 following LPS treatment (from 0-0.5 hr) and 0-6 hpf control treatment, cortisol treatment or  
954 dexamethasone treatment (n=4 samples per time-point). Groups with the same capitals do not  
955 significantly differ from one another (Tukey HSD following a significant treatment effect for this time-  
956 point). Note: control-treated subjects showed no significant change over time:  $F(3,12)=0.562$ , ns.

957

958



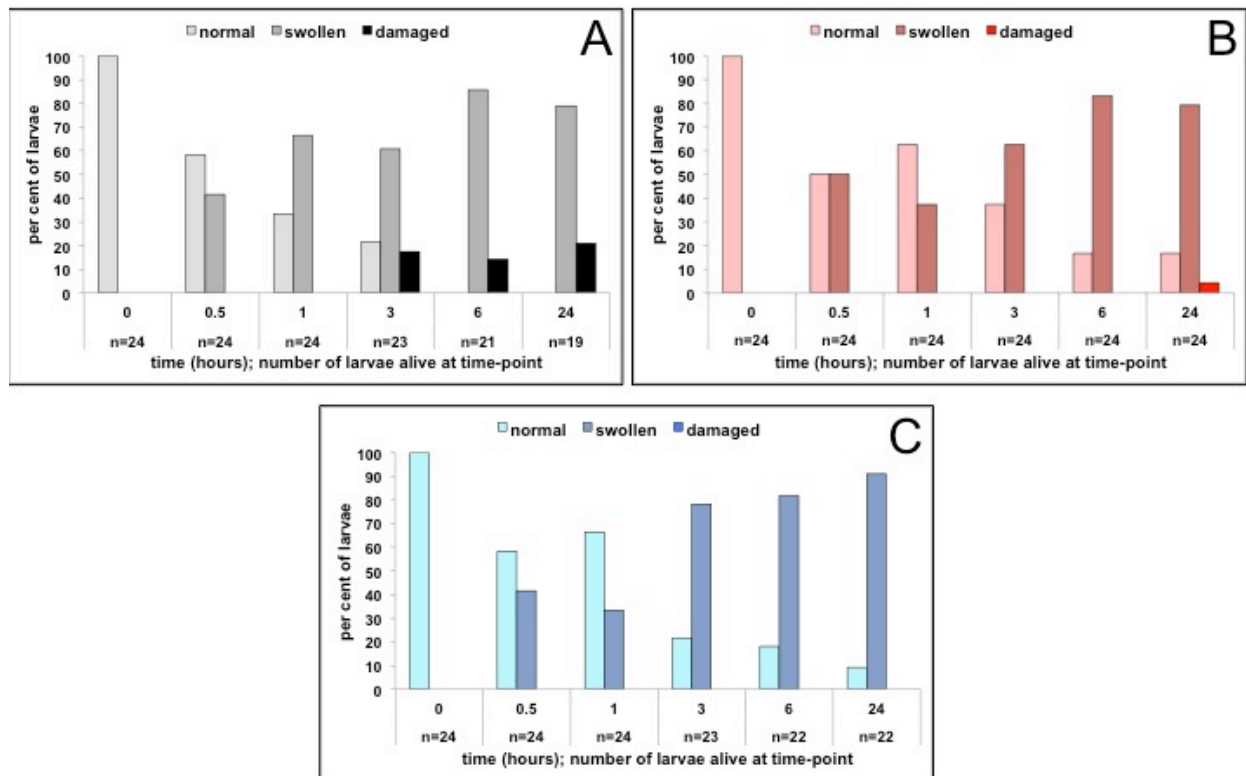

959  
960 **Figure 6, panel A:** Per cent of larvae following LPS treatment (from 0-0.5 hr) in the 0-6 hpf control  
961 treatment group showing normal, swollen or damaged tail fins (time-points: 0hr, 0.5hr, 1 hr, 3 hrs, 6  
962 hrs and 24 hrs).

963 **Figure 6, panel B:** Per cent of larvae following LPS treatment (from 0-0.5 hr) in the 0-6 hpf cortisol  
964 treatment group showing normal, swollen or damaged tail fins (time-points: 0 hr, 0.5 hr, 1 hr, 3 hrs, 6  
965 hrs and 24 hrs).

966 **Figure 6, panel C:** Per cent of larvae following LPS treatment (from 0-0.5 hr) in the 0-6 hpf  
967 dexamethasone treatment group showing normal, swollen or damaged tail fins (time-points: 0 hr, 0.5  
968 hr, 1 hr, 3 hrs, 6 hrs and 24 hrs).

969

970

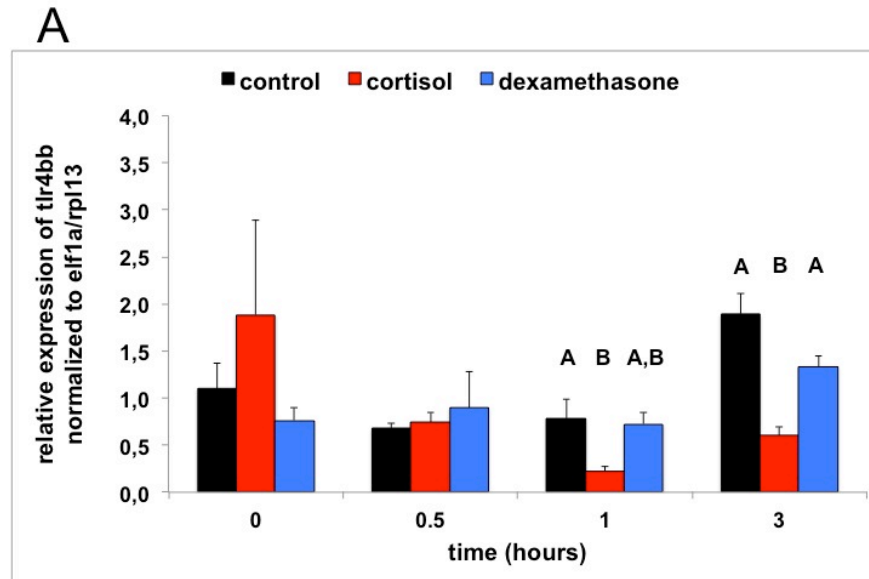

971

972 **Figure 7, panel A:** Transcript abundance (relative normalized expression; mean+SEM) of *tlr44bb*  
973 following LPS treatment (from 0-0.5 hr) and 0-6 hpf control treatment, cortisol treatment or  
974 dexamethasone treatment (n=4 samples per time-point). Groups with the same capitals do not  
975 significantly differ from one another (Tukey HSD following a significant treatment effect for this time-  
976 point).

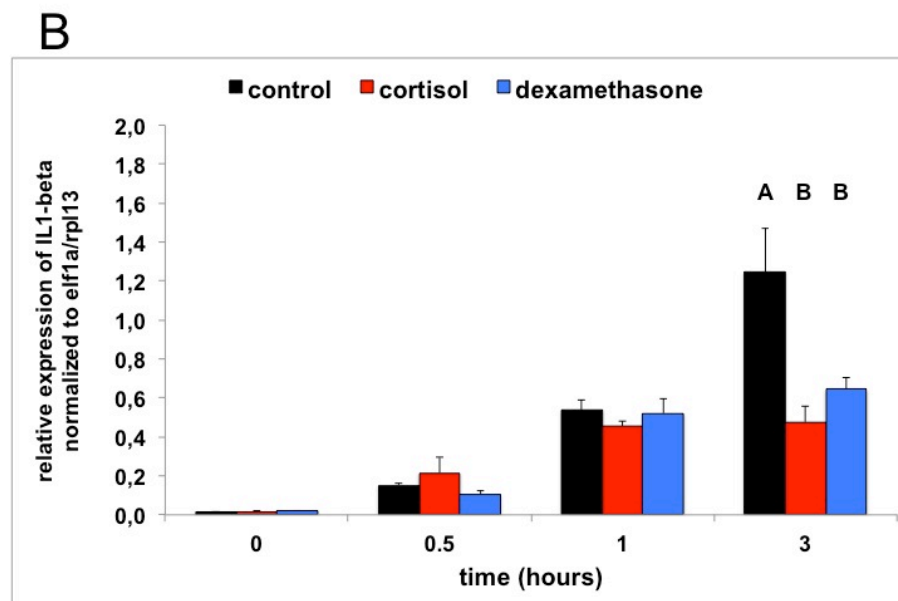

977

978 **Figure 7, panel B:** Transcript abundance (relative normalized expression; mean+SEM) of *IL1-beta*  
979 following LPS treatment (from 0-0.5 hr) and 0-6 hpf control treatment, cortisol treatment or  
980 dexamethasone treatment (n=4 samples per time-point). Groups with the same capitals do not  
981 significantly differ from one another (Tukey HSD following a significant treatment effect for this time-  
982 point).

C

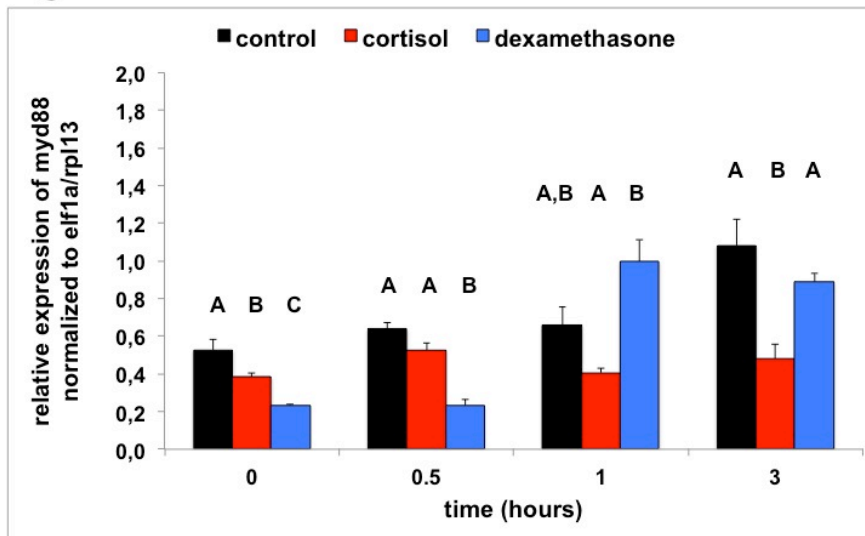

983

984 **Figure 7, panel C:** Transcript abundance (relative normalized expression; mean+SEM) of *myd88*  
985 following LPS treatment (from 0-0.5 hr) and 0-6 hpf control treatment, cortisol treatment or  
986 dexamethasone treatment (n=4 samples per time-point). Groups with the same capitals do not  
987 significantly differ from one another (Tukey HSD following a significant treatment effect for this time-  
988 point).

D

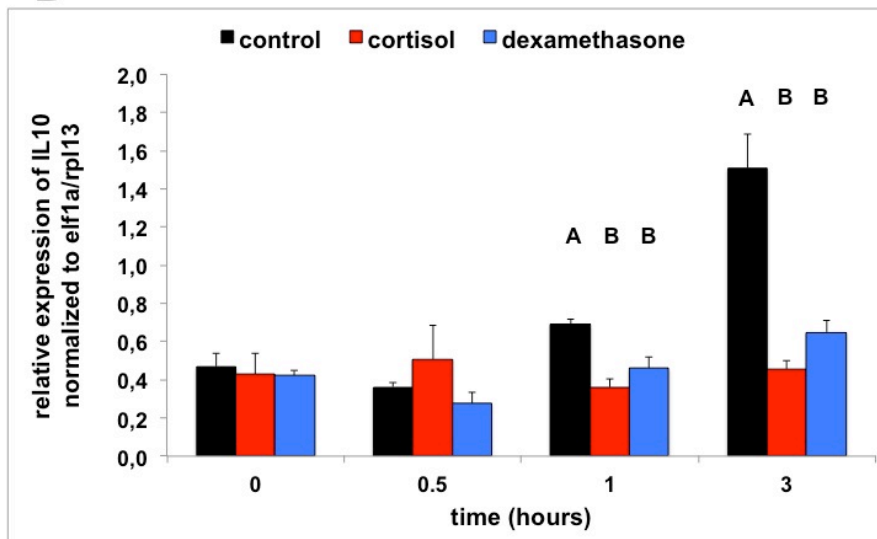

989

990 **Figure 7, panel D:** Transcript abundance (relative normalized expression; mean+SEM) of *IL10*  
991 following LPS treatment (from 0-0.5 hr) and 0-6 hpf control treatment, cortisol treatment or  
992 dexamethasone treatment (n=4 samples per time-point). Groups with the same capitals do not  
993 significantly differ from one another (Tukey HSD following a significant treatment effect for this time-  
994 point).

E

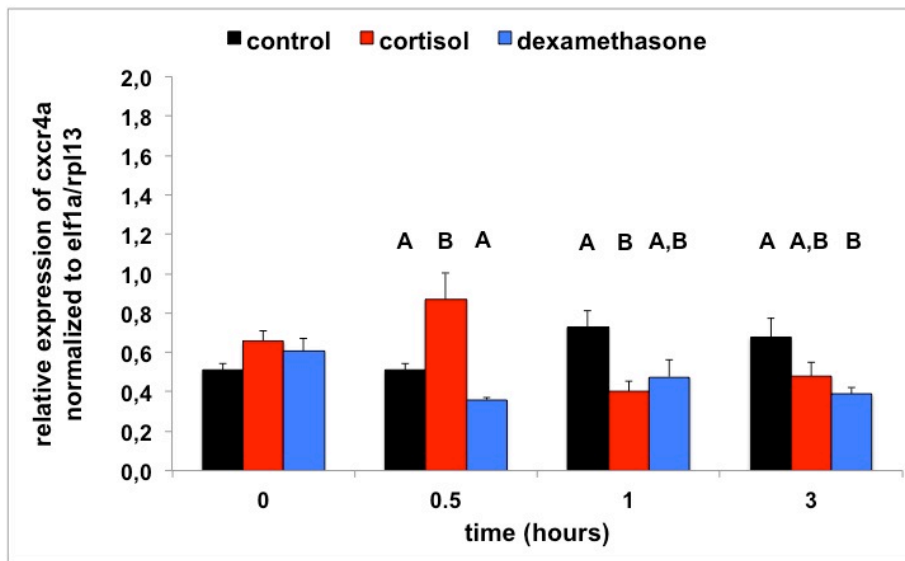

995

996 **Figure 7, panel E:** Transcript abundance (relative normalized expression; mean+SEM) of *cxcr4a*  
997 following LPS treatment (from 0-0.5 hr) and 0-6 hpf control treatment, cortisol treatment or  
998 dexamethasone treatment (n=4 samples per time-point). Groups with the same capitals do not  
999 significantly differ from one another (Tukey HSD following a significant treatment effect for this time-  
1000 point).

1001

1002

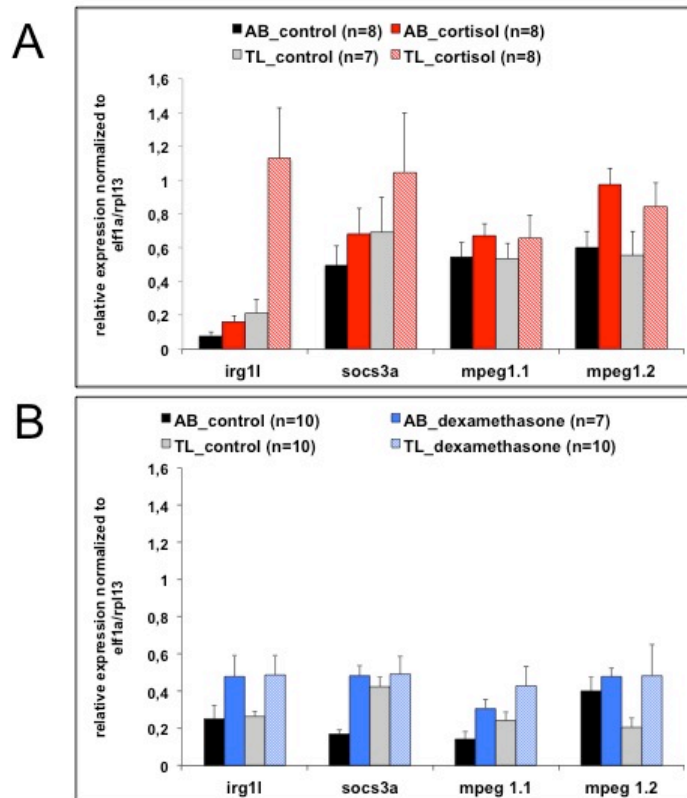

1003

1004 **Supplementary figure 1, panel A:** Transcript abundance (relative normalized expression;  
1005 mean+SEM) of the different immune related genes for the different treatments (cortisol or control) and  
1006 strains (AB or TL). One subject was removed from the statistical analyses (TL control) as it was a  
1007 consistent outlier following Grubb's outlier test. Treatment effects were found for *irg1l*  
1008 ( $F(1,23)=11.789$ ,  $p\leq 0.01$ ; treatment \* strain:  $F(1,23)=8.446$ ,  $p\leq 0.01$ ; AB:  $p\leq 0.05$ ; TL:  $p\leq 0.01$ ) and  
1009 *mpeg1.1* ( $F(1,23)=8.614$ ,  $p\leq 0.01$ ).

1010 **Supplementary figure 1, panel B:** Transcript abundance (relative normalized expression;  
1011 mean+SEM) of the different immune related genes for the different treatments (dexamethasone or  
1012 control) and strains (AB or TL). Treatment effects were found for *irg1l* ( $F(1,33)=6.484$ ,  $p\leq 0.05$ ),  
1013 *socs3a* ( $F(1,33)=7.655$ ,  $p\leq 0.01$ ) and *mpeg1.1* ( $F(1,33)=5.487$ ,  $p\leq 0.05$ ).

1014

| Gene                         | Forward primer sequence (5'-3') | Reverse primer sequence (5'-3')  | Amplification length (bp) | Source         |
|------------------------------|---------------------------------|----------------------------------|---------------------------|----------------|
| <i>elf1a</i>                 | CTGGAGGCCAGCTCA<br>AACAT        | TCAAGAAGAGTAGTACC<br>GCTAGCATTAC | 85                        | NM_131263.1    |
| <i>rpl13</i>                 | TCTGGAGGACTGTA<br>AGAGGTATGC    | AGACGCACAATCTTGAG<br>AGCAG       | 147                       | NM_212784      |
| <i>cldn5a</i>                | CTCGGGGGAAGCAT<br>ACTCTG        | TATTCCCCGTTGGATGT<br>GGC         | 101                       | NM_213274.1    |
| <i>cldn2</i>                 | CCCCTACTGGGCAAC<br>ATCTG        | CTTGCAGGTCGACGGTT<br>AGT         | 155                       | XM_005170272.4 |
| <i>oclnb</i>                 | TGACAAAGTCAGTGC<br>TGCTCA       | GGATATTCATCTGTGTC<br>AAGCTCAT    | 162                       | NM_001008618.1 |
| <i>tlr2</i>                  | TGCTGTCCGGTCGATT<br>ACCTG       | ACACAGGGAAAACGAAG<br>GCT         | 130                       | NM_212812.1    |
| <i>tlr4ba</i>                | ACTTTCAAGATTTCC<br>GTTGAGGTAT   | CCACAAGAACAAGCCTT<br>TGCAG       | 209                       | NM_001131051.1 |
| <i>tlr4bb</i>                | ATCACACTGCTGTGT<br>TGCGA        | AGGCCAGTGAGAGCTTT<br>GTG         | 178                       | NM_212813.2    |
| <i>tlr5a</i>                 | TGGTTCCGGTTGTGA<br>GTTCC        | TCTTGAAGATGACACCG<br>CGT         | 162                       | XM_001919017.6 |
| <i>tlr5b</i>                 | GGTCTTGAAGCGAG<br>TG GTGT       | CATTTTGCGCCAAGGTC<br>AGT         | 118                       | NM_001130595.2 |
| <i>il1<math>\beta</math></i> | GATGGCATGCGGGCA<br>ATATG        | AGCTCATTGCAAGCGGA<br>TCT         | 116                       | NM_212844.2    |
| <i>il10</i>                  | GACCATTTCTGCCAAC<br>AGCTC       | ACCATATCCCGCTTGAG<br>TTCC        | 102                       | NM_001020785.2 |
| <i>myd88</i>                 | GTTTGCCTCAGTCT<br>TTGCC         | GGTCAGAAAGCGCAGAA<br>TGC         | 103                       | NM_212814.2    |
| <i>cxcr4a</i>                | ACTTGTACAGCAGCG<br>TCCTC        | CTTTGGCGAACACCAAG<br>TCG         | 174                       | NM_131882.3    |
| <i>cxcr4b</i>                | GCGCCTTTTTGAGCA<br>CACTT        | ATTGCTGACTGAGAGGT<br>CGC         | 127                       | NM_131834.1    |
| <i>ptpn6</i>                 | ACAGGAAGAACTGC<br>GCTCAT        | TGCAGCACAGCCAAGTA<br>GAT         | 225                       | NM_199960.1    |

1015

1016 **Table 1:** Nucleotide sequences of forward and reverse primers used for qPCR.

1017 Reference genes: elongation factor 1 $\alpha$  (*elf1a*); ribosomal protein L13 (*rpl13*)

1018

1019

| <b>4 hrs</b>  | <b>treatment</b>            | <b>%dead</b> | <b>%(alive+affected)<br/>(tail fin, shape, heart)</b> | <b>%(alive+intact)</b> |
|---------------|-----------------------------|--------------|-------------------------------------------------------|------------------------|
|               | <b>control (n=18)</b>       | 11.1         | 83.3                                                  | 5.6                    |
|               | <b>cortisol (n=19)</b>      | 0.0          | 73.7                                                  | 26.3                   |
|               | <b>dexamethasone (n=20)</b> | 10.0         | 60.0                                                  | 30.0                   |
|               |                             |              |                                                       |                        |
| <b>28 hrs</b> | <b>treatment</b>            | <b>%dead</b> | <b>%(alive+affected)<br/>(tail fin, shape, heart)</b> | <b>%(alive+intact)</b> |
|               | <b>control (n=15)</b>       | 86.7         | 13.3                                                  | 0.0                    |
|               | <b>cortisol (n=16)</b>      | 12.5         | 37.5                                                  | 50.0                   |
|               | <b>dexamethasone (n=16)</b> | 12.5         | 31.3                                                  | 56.3                   |

1020  
1021  
1022  
1023  
1024  
1025  
1026  
1027  
1028

**Table 2:** Per cent of larvae dead, alive and affected (regardless of phenotypical changes in the tail fin, shape or cardiac area), and alive and intact at 4hrs and 28hrs after LPS treatment (0-0.5hr) in the different treatment groups: 0-6 hpf treatment with control, cortisol-containing or dexamethasone-containing medium. Note that the number of larvae at 28hrs is lower than at 4hrs; per treatment n=3-4 larvae (alive) were randomly selected for staining for reactive oxygen species in the tail fin (not reported here); they were not scored for phenotypical changes.
